# Supplementary material for: Epithelial Smad4 Deletion Up-Regulates Inflammation and Promotes Inflammation-Associated Cancer
Source: PubMed Central journal article supplement — Cell Mol Gastroenterol Hepatol. 2018 May 24;6(3):257–76. doi: 10.1016/j.jcmgh.2018.05.006 (PMC6083016; doi:10.1016/j.jcmgh.2018.05.006), 2018-05-24

Table S1. Genes upregulated &gt;2-fold by Smad4 loss

| GeneSymbol    | A_SMAD4_KO_1 | A_SMAD4_KO_2 | A_SMAD4_KO_3 | A_SMAD4_WT_1 | A_SMAD4_WT_2 | A_SMAD4_WT_3 | logFC       | logCPM      | PValue   | FDR      |
|---------------|--------------|--------------|--------------|--------------|--------------|--------------|-------------|-------------|----------|----------|
| Al747448      | 550.7263437  | 834.2114653  | 765.9011651  | 77.94865292  | 72.25539655  | 82.5158702   | 3.208174893 | 8.633895927 | 1.17E-69 | 3.41E-66 |
| Lrg1          | 90.82418325  | 79.18527923  | 44.41957548  | 7.202718706  | 8.574553453  | 7.35401951   | 3.211925964 | 5.30657947  | 1.57E-41 | 2.28E-38 |
| Nrp1          | 31.0846605   | 33.9192425   | 28.43015988  | 6.579406511  | 7.022263603  | 6.712899861  | 2.20086193  | 4.245445092 | 1.06E-38 | 1.12E-35 |
| Vsig1         | 29.78597523  | 32.78860109  | 36.46565701  | 7.375860983  | 6.209159397  | 4.940392594  | 2.415890143 | 4.292880174 | 2.55E-37 | 2.46E-34 |
| Dhrs9         | 23.79526572  | 26.08551269  | 33.77356152  | 5.298153664  | 4.102480316  | 4.600976309  | 2.576611425 | 4.025119694 | 6.67E-37 | 5.96E-34 |
| Hif1a         | 309.4222405  | 368.2660615  | 394.1472524  | 103.5390814  | 94.17225085  | 103.484254   | 1.83125996  | 7.838275627 | 1.59E-35 | 1.32E-32 |
| Ifit2         | 61.41524569  | 54.83610871  | 43.31826369  | 11.87756017  | 13.15750444  | 13.50122556  | 2.049799567 | 5.045465962 | 3.95E-34 | 3.06E-31 |
| Atp12a        | 197.0650175  | 276.0380259  | 258.7266917  | 62.50436185  | 68.81818331  | 69.16549632  | 1.868024411 | 7.279845781 | 5.98E-33 | 4.34E-30 |
| Ly6c1         | 25.8899194   | 22.24940788  | 25.16701384  | 5.956094315  | 5.987403704  | 5.619225164  | 2.060166616 | 3.921948236 | 7.46E-32 | 4.56E-29 |
| H60c          | 9.802979189  | 12.19477528  | 7.9947078    | 0.969596749  | 1.515330567  | 1.206813458  | 3.020453855 | 2.491595201 | 8.78E-30 | 4.63E-27 |
| F13a1         | 3.39333895   | 2.826603542  | 3.426303343  | 0.277027643  | 0.147837128  | 0.037712921  | 4.312602857 | 0.776769432 | 1.10E-29 | 5.40E-27 |
| Pcsk6         | 5.739351063  | 4.68408587   | 4.160511202  | 0.51942683   | 0.443511385  | 0.301703365  | 3.504877423 | 1.412029846 | 1.12E-29 | 5.40E-27 |
| Gsta3         | 41.30657043  | 48.25416047  | 55.39190405  | 14.50932278  | 13.30534156  | 14.36862274  | 1.78047466  | 4.963849632 | 1.10E-28 | 5.09E-26 |
| Sifn5         | 33.47256569  | 26.7315935   | 28.59331718  | 8.20694391   | 5.026462369  | 5.430660561  | 2.24720097  | 4.163375431 | 3.35E-27 | 1.49E-24 |
| 181000818Rik  | 5.82313721   | 7.793349766  | 6.118398827  | 0.900339838  | 0.665267078  | 1.093674696  | 2.886284089 | 1.907989137 | 1.68E-26 | 6.71E-24 |
| Sipi          | 35.44154014  | 32.14252028  | 32.26435648  | 11.21961952  | 8.389757042  | 8.749397571  | 1.814227563 | 4.418587475 | 2.02E-25 | 7.10E-23 |
| Egln3         | 67.28027597  | 75.51069462  | 96.01807225  | 28.25681954  | 21.06679081  | 21.68492933  | 1.749124326 | 5.690866955 | 1.17E-24 | 3.74E-22 |
| Trf           | 36.06993625  | 46.51781829  | 31.77488457  | 11.25424798  | 8.057123503  | 8.03285208   | 2.062637376 | 4.562692985 | 1.19E-24 | 3.74E-22 |
| Cp            | 2.262225967  | 6.420428045  | 3.711828622  | 0.207770732  | 0.073918564  | 0.075425841  | 5.042065512 | 1.10541726  | 2.36E-24 | 7.03E-22 |
| B3gnt5        | 185.0835985  | 289.2019224  | 205.6189899  | 60.77293908  | 62.90469817  | 72.89907545  | 1.790283883 | 7.190779907 | 2.59E-24 | 7.51E-22 |
| Naip6         | 96.81489276  | 110.6817187  | 80.19181396  | 35.90970817  | 34.00253955  | 37.07180092  | 1.427020122 | 6.040111396 | 2.24E-23 | 5.78E-21 |
| Abca13        | 7.834004736  | 8.560570727  | 6.199977478  | 1.315881302  | 0.960941335  | 1.546229743  | 2.559179826 | 2.144904203 | 4.38E-23 | 1.11E-20 |
| Steap4        | 28.4035038   | 48.49644077  | 35.4867132   | 9.938366676  | 8.168001349  | 9.164239697  | 2.042285645 | 4.541826281 | 6.88E-23 | 1.66E-20 |
| Hoxd13        | 40.38492281  | 58.83373372  | 26.10516833  | 5.194268298  | 6.800507911  | 8.070565001  | 2.643047657 | 4.598808946 | 1.19E-22 | 2.82E-20 |
| Apobec2       | 4.901489594  | 6.904988653  | 5.221033666  | 1.142739026  | 0.665267078  | 0.565693808  | 2.826429501 | 1.70472507  | 3.96E-22 | 8.84E-20 |
| 2310079G19Rik | 3.896055831  | 3.190023997  | 3.752617947  | 0.657940651  | 0.258714975  | 0.226277523  | 3.210080797 | 1.019608177 | 8.14E-22 | 1.72E-19 |
| Gm11545       | 101.7163824  | 109.9548778  | 82.27206956  | 39.23403988  | 40.58129177  | 40.27739916  | 1.291334837 | 6.109259432 | 6.07E-21 | 1.17E-18 |
| Naip7         | 2.723049775  | 3.714964655  | 3.059199413  | 0.484798374  | 0.258714975  | 0.377129206  | 3.060841085 | 0.852382543 | 1.34E-20 | 2.51E-18 |
| Zfp750        | 32.88606266  | 36.42280564  | 32.01962053  | 10.73482115  | 12.49223736  | 12.82239299  | 1.49129323  | 4.518641006 | 1.88E-20 | 3.46E-18 |
| Abcg1         | 11.01787832  | 10.57957326  | 9.340755542  | 2.597134149  | 2.845864723  | 2.941607804  | 1.882658581 | 2.717678366 | 9.99E-20 | 1.68E-17 |
| Gsdmc3        | 200.751608   | 237.7577379  | 218.6715741  | 86.32873911  | 48.60145599  | 52.00611746  | 1.813385938 | 7.136523863 | 1.25E-19 | 2.05E-17 |
| Rbm24         | 6.409640239  | 7.470309361  | 4.527615132  | 0.865711383  | 1.256615592  | 1.093674696  | 2.514699008 | 1.858997317 | 2.88E-19 | 4.52E-17 |
| Bmp3          | 65.98159069  | 57.82423246  | 62.32608938  | 15.51354798  | 23.91265553  | 24.17398208  | 1.549728526 | 5.379899693 | 9.63E-19 | 1.36E-16 |
| Hoxd11        | 4.356879639  | 6.016627539  | 2.284202229  | 0.311656098  | 0.406552103  | 0.414842126  | 3.469144403 | 1.216488037 | 1.71E-18 | 2.25E-16 |
| Trim6         | 16.04504713  | 17.40380181  | 15.70389032  | 5.99072277   | 5.026462369  | 4.714115071  | 1.641400644 | 3.438577019 | 1.79E-18 | 2.33E-16 |
| Skil          | 99.87308712  | 112.4584409  | 107.4798727  | 55.19775778  | 45.45991701  | 47.10343779  | 1.113658965 | 6.284783057 | 7.64E-18 | 9.44E-16 |
| Stom          | 126.2238303  | 141.4109372  | 117.3101002  | 65.44778055  | 52.00170995  | 53.89176349  | 1.16748583  | 6.535276709 | 1.09E-17 | 1.30E-15 |
| Smoc2         | 85.41997678  | 80.11402039  | 74.76683366  | 37.98741548  | 38.73332766  | 35.48785825  | 1.098442677 | 5.877427556 | 2.69E-17 | 3.03E-15 |
| Akt3          | 47.75810374  | 50.79810365  | 28.75647449  | 13.0202992   | 10.64427325  | 13.27494804  | 1.784623875 | 4.775679936 | 3.35E-17 | 3.67E-15 |
| Pmpa1         | 47.79999681  | 41.26841171  | 34.34461208  | 16.03297481  | 15.7076949   | 15.42458451  | 1.387219239 | 4.830667823 | 3.60E-17 | 3.83E-15 |
| Stxbp1        | 32.04820119  | 32.74822104  | 21.29202792  | 10.25002277  | 7.872327092  | 7.504871193  | 1.746524998 | 4.22035053  | 4.87E-17 | 5.05E-15 |
| Rps15a-ps6    | 3.309552803  | 7.995250019  | 6.934185337  | 0.623312196  | 0.850063489  | 0.942823014  | 2.913299726 | 1.793947394 | 7.06E-17 | 7.06E-15 |
| Ltf           | 12.06520516  | 14.98099877  | 8.321022404  | 3.151189434  | 2.43931262   | 2.187349393  | 2.180792033 | 2.850338855 | 1.19E-16 | 1.15E-14 |
| Ces2f         | 3.225766656  | 5.41092678   | 3.630249971  | 0.277027643  | 0.850063489  | 0.565693808  | 2.856398145 | 1.237139649 | 1.52E-16 | 1.46E-14 |

|             |             |             |             |              |             |             |             |             |          |          |
|-------------|-------------|-------------|-------------|--------------|-------------|-------------|-------------|-------------|----------|----------|
| Slc7a11     | 11.60438135 | 11.06413386 | 15.29599707 | 3.497473987  | 1.330534156 | 1.772507267 | 2.516713207 | 2.89589952  | 3.27E-16 | 2.96E-14 |
| Paqr8       | 53.91638554 | 49.95012259 | 65.79318205 | 26.31762604  | 20.17976804 | 20.89295799 | 1.331340721 | 5.305222179 | 3.77E-16 | 3.36E-14 |
| Cxcl5       | 1.885188306 | 5.653207084 | 1.753940997 | 0.173142277  | 0.073918564 | 0.188564603 | 4.368864376 | 0.727676558 | 6.27E-16 | 5.48E-14 |
| Areg        | 19.06134842 | 19.18052403 | 17.13151671 | 7.652888625  | 6.024362986 | 5.920928529 | 1.496420724 | 3.646830545 | 7.44E-16 | 6.40E-14 |
| Hspa12a     | 20.31814063 | 21.15914651 | 11.33943249 | 3.566730898  | 5.063421651 | 4.110708342 | 2.05106542  | 3.451640605 | 1.26E-15 | 1.03E-13 |
| Adcy2       | 10.55705451 | 12.55819574 | 13.54205607 | 4.155414638  | 3.843765341 | 3.99756958  | 1.610182766 | 3.025101049 | 1.50E-15 | 1.20E-13 |
| Il1rn       | 90.02821486 | 113.4679422 | 132.7284652 | 53.53559192  | 45.16424275 | 47.06572487 | 1.205596579 | 6.32854068  | 2.18E-15 | 1.69E-13 |
| Itga2       | 78.17247507 | 73.57245219 | 78.68260891 | 33.62423011  | 39.694269   | 38.5048919  | 1.043236495 | 5.834861363 | 2.63E-15 | 2.02E-13 |
| Anxa8       | 24.25608953 | 24.95487127 | 27.49200539 | 10.35390814  | 11.19866248 | 9.918498109 | 1.284891047 | 4.174931551 | 3.07E-15 | 2.35E-13 |
| Tcf4        | 52.61770026 | 59.76247489 | 50.53797431 | 25.20951547  | 24.65184118 | 25.87106351 | 1.105094968 | 5.315137957 | 3.51E-15 | 2.63E-13 |
| C3          | 103.7272499 | 121.1805318 | 67.18001912 | 34.76696914  | 36.40489289 | 36.73238463 | 1.436588075 | 6.059398341 | 3.58E-15 | 2.67E-13 |
| Gpr110      | 12.98685277 | 15.86935989 | 10.72759261 | 2.943418702  | 3.252416827 | 4.63868923  | 1.869967682 | 3.074719461 | 6.16E-15 | 4.52E-13 |
| Ms4a18      | 22.49658045 | 24.02613011 | 18.80387906 | 6.267750413  | 8.315838478 | 8.636258809 | 1.492960567 | 3.885936762 | 6.60E-15 | 4.79E-13 |
| Macc1       | 15.66800947 | 20.39192555 | 23.37228352 | 7.410489438  | 5.580851601 | 6.63747402  | 1.597067788 | 3.723175677 | 8.69E-15 | 6.23E-13 |
| Reg3b       | 6802.010765 | 8764.651503 | 5046.373774 | 2524.414393  | 2367.168101 | 2535.628214 | 1.472662935 | 12.19025603 | 8.76E-15 | 6.24E-13 |
| B4galt6     | 83.70236076 | 86.21140803 | 91.49045712 | 47.99503907  | 39.17683905 | 43.36985865 | 1.001488613 | 6.030452165 | 1.21E-14 | 8.33E-13 |
| Gm13826     | 7.331287855 | 9.973872498 | 9.259176891 | 3.116560979  | 2.217556927 | 2.074210631 | 1.837468656 | 2.509635636 | 1.65E-14 | 1.09E-12 |
| Abcc4       | 35.06450248 | 32.74822104 | 33.7327722  | 16.65628701  | 12.45527808 | 13.0109576  | 1.268303223 | 4.58368521  | 2.20E-14 | 1.43E-12 |
| Ankdd1b     | 3.26765973  | 4.643705819 | 3.467092669 | 0.692569106  | 0.480470668 | 1.055961776 | 2.348376516 | 1.204244486 | 2.54E-14 | 1.64E-12 |
| Ifi44       | 25.7223471  | 17.32304171 | 23.20912622 | 8.518600008  | 7.170100732 | 7.919713319 | 1.487505626 | 3.907179408 | 2.69E-14 | 1.72E-12 |
| Lama4       | 5.865030284 | 9.287411638 | 2.488148856 | 0.554055285  | 0.628307796 | 0.716545491 | 3.20814185  | 1.71229753  | 2.76E-14 | 1.74E-12 |
| Cald1       | 4.147414272 | 5.168646477 | 4.36445783  | 0.934968294  | 1.293574874 | 1.31995222  | 1.946947913 | 1.539985137 | 4.06E-14 | 2.49E-12 |
| Lama3       | 8.378614691 | 7.026128804 | 13.01179484 | 2.562505694  | 2.180597645 | 2.300488154 | 2.009294081 | 2.569274057 | 4.86E-14 | 2.96E-12 |
| Prune2      | 4.901489594 | 6.339667944 | 6.730238709 | 1.766051221  | 1.774045542 | 1.621655584 | 1.796817699 | 1.960535241 | 5.92E-14 | 3.56E-12 |
| Podxl       | 8.085363177 | 8.560570727 | 3.099988739 | 0.8450169919 | 1.034859899 | 1.018248855 | 2.978016603 | 1.896578966 | 8.36E-14 | 4.90E-12 |
| Cldn8       | 116.4208511 | 160.9548817 | 132.6060972 | 57.20620819  | 63.23733171 | 70.14603225 | 1.105235885 | 6.645750937 | 1.01E-13 | 5.78E-12 |
| Zfp608      | 39.71463364 | 35.85748493 | 30.63278346 | 14.12840977  | 16.44688054 | 15.12288115 | 1.216550736 | 4.663848235 | 1.14E-13 | 6.43E-12 |
| Hook1       | 335.4378392 | 363.905016  | 387.1722778 | 191.9108994  | 159.5901802 | 176.4964682 | 1.041052622 | 8.072129404 | 2.15E-13 | 1.18E-11 |
| Ubn2        | 97.44328886 | 110.8432389 | 79.947078   | 49.62257647  | 43.46411578 | 46.53774398 | 1.045517158 | 6.156812602 | 2.32E-13 | 1.26E-11 |
| Pla2g2a     | 105.7381174 | 93.72209744 | 62.85635061 | 35.84045125  | 36.95928212 | 36.69467171 | 1.260315596 | 5.954112474 | 2.33E-13 | 1.26E-11 |
| Gm9159      | 2.555477481 | 4.401425515 | 3.263146041 | 0.865711383  | 0.70222636  | 0.565693808 | 2.248508706 | 1.071006896 | 4.19E-13 | 2.21E-11 |
| Ereg        | 3.854162758 | 3.513064402 | 5.54734827  | 1.246624391  | 0.70222636  | 1.018248855 | 2.112796753 | 1.42421172  | 6.86E-13 | 3.51E-11 |
| Me1         | 42.39579034 | 39.57244959 | 48.70245466 | 17.48736994  | 21.39942435 | 21.2700872  | 1.11940706  | 4.992729706 | 8.04E-13 | 4.06E-11 |
| Rdx         | 10.22190992 | 11.95249498 | 11.09469654 | 1.454395123  | 3.252416827 | 3.545014533 | 2.013528219 | 2.794949082 | 8.70E-13 | 4.35E-11 |
| Fam124a     | 35.56721936 | 44.74109606 | 35.07881994 | 16.41388782  | 17.59261829 | 18.17762771 | 1.14493104  | 4.805562382 | 8.81E-13 | 4.39E-11 |
| Zbed6       | 67.99245822 | 79.71021988 | 52.53665126 | 27.0448236   | 31.93281975 | 29.98177185 | 1.170578751 | 5.591954834 | 9.20E-13 | 4.55E-11 |
| B3galt2     | 19.14513457 | 25.19715157 | 23.37228352 | 3.566730898  | 6.320037243 | 8.711684651 | 1.865593586 | 3.848224478 | 1.86E-12 | 8.76E-11 |
| Sppl2a      | 623.4946122 | 736.9763035 | 736.940744  | 344.6223873  | 332.9292134 | 366.7958654 | 1.006011014 | 9.032502269 | 2.26E-12 | 1.05E-10 |
| Pgap1       | 53.79070632 | 51.68646477 | 78.0299797  | 29.57270084  | 20.80807584 | 22.96716862 | 1.322444972 | 5.420940257 | 2.43E-12 | 1.12E-10 |
| Osmr        | 6.493426386 | 9.771972245 | 3.671039296 | 0.51942683   | 1.182697028 | 1.35766514  | 2.704093997 | 1.945993974 | 2.52E-12 | 1.16E-10 |
| Grhl3       | 4.692024227 | 4.805226021 | 1.876308974 | 0.51942683   | 0.739185642 | 0.565693808 | 2.632296684 | 1.15757947  | 3.10E-12 | 1.41E-10 |
| Tmem181c-ps | 31.54548431 | 32.38480058 | 36.91433959 | 16.82942928  | 9.313739095 | 11.65329245 | 1.414432404 | 4.532263893 | 4.83E-12 | 2.10E-10 |
| Pdgfa       | 48.84732365 | 37.06888645 | 29.8985756  | 14.23229514  | 16.89039193 | 15.65086203 | 1.307878188 | 4.761520538 | 5.80E-12 | 2.47E-10 |
| Reg3g       | 3253.835015 | 4051.774657 | 2527.592134 | 1532.066749  | 899.6628454 | 945.0103635 | 1.542014656 | 11.10439043 | 6.14E-12 | 2.59E-10 |
| Myo3a       | 3.309552803 | 3.068883846 | 3.140778064 | 0.969596749  | 0.628307796 | 0.905110094 | 1.918304932 | 1.033419593 | 6.36E-12 | 2.66E-10 |
| Sulf2       | 156.0516986 | 135.9596304 | 134.5639849 | 83.55846268  | 58.58046216 | 55.36256739 | 1.110564416 | 6.701136615 | 7.39E-12 | 3.09E-10 |

|               |             |             |             |             |             |             |             |             |          |          |
|---------------|-------------|-------------|-------------|-------------|-------------|-------------|-------------|-------------|----------|----------|
| D10Bwg1379e   | 32.25766656 | 30.325418   | 25.9012217  | 11.91218863 | 14.2662829  | 13.99149353 | 1.139452071 | 4.42471049  | 1.05E-11 | 4.28E-10 |
| Alpk1         | 43.73636869 | 47.0023789  | 37.52617947 | 22.54312441 | 20.69719799 | 19.64843161 | 1.02779031  | 4.995471736 | 1.38E-11 | 5.52E-10 |
| Tnip3         | 54.79614008 | 83.42518454 | 66.36423261 | 31.13098133 | 32.26545329 | 33.48907346 | 1.078450485 | 5.652052246 | 1.63E-11 | 6.44E-10 |
| Gyk           | 74.15074002 | 119.8479902 | 95.16149642 | 38.09130085 | 41.50527382 | 49.81876807 | 1.160062743 | 6.125119582 | 1.67E-11 | 6.58E-10 |
| Lbp           | 8.546186985 | 15.54631948 | 9.299966217 | 1.869936587 | 3.32635391  | 3.281024089 | 1.97878957  | 2.807961874 | 1.77E-11 | 6.92E-10 |
| Csta1         | 1.717616012 | 2.261282834 | 2.732884809 | 0.58868374  | 0.332633539 | 0.452555047 | 2.27140043  | 0.481195301 | 1.85E-11 | 7.20E-10 |
| Ghr           | 12.02331208 | 14.81947857 | 11.09469654 | 3.324331711 | 4.472073137 | 5.392947641 | 1.525452129 | 3.096068741 | 2.16E-11 | 8.26E-10 |
| A730098P11Rik | 1.801402159 | 2.503563137 | 2.773674135 | 0.58868374  | 0.443511385 | 0.527980888 | 2.169870697 | 0.573021925 | 2.90E-11 | 1.09E-09 |
| Spats2l       | 60.15845348 | 56.85511124 | 39.72880305 | 18.80325124 | 24.94751543 | 23.98541748 | 1.210560929 | 5.226604715 | 3.06E-11 | 1.14E-09 |
| C1galt1       | 177.2077007 | 216.9620119 | 208.5558213 | 78.98750658 | 98.2008126  | 113.478178  | 1.052277276 | 7.218531008 | 3.22E-11 | 1.18E-09 |
| Prpf40a       | 194.0487162 | 261.9857683 | 261.5411552 | 120.4723961 | 108.6233302 | 125.7725901 | 1.015848371 | 7.482052267 | 4.12E-11 | 1.47E-09 |
| Clmp          | 6.116388725 | 6.904988653 | 6.199977478 | 2.631762604 | 2.143638363 | 2.262775234 | 1.446123826 | 2.143431071 | 4.41E-11 | 1.57E-09 |
| Clca4         | 1382.55521  | 1822.957384 | 1474.248592 | 849.3321236 | 665.1562004 | 701.8374517 | 1.078249878 | 10.16664936 | 4.84E-11 | 1.69E-09 |
| F3            | 28.90622068 | 31.90023997 | 31.77488457 | 13.0202992  | 14.93154998 | 16.59368505 | 1.055906982 | 4.516822761 | 6.40E-11 | 2.16E-09 |
| BC005561      | 13.82471424 | 16.79810105 | 13.17495214 | 6.544778055 | 5.654770165 | 6.260344814 | 1.245583745 | 3.380618575 | 6.64E-11 | 2.23E-09 |
| Tmem184c      | 13.44767658 | 19.09976393 | 14.03152798 | 6.5101496   | 5.839566575 | 6.562048178 | 1.29990158  | 3.453259599 | 9.31E-11 | 3.05E-09 |
| Slc28a3       | 57.98001366 | 69.89786759 | 42.54326651 | 26.31762604 | 25.87149749 | 25.79563767 | 1.127694362 | 5.372864645 | 1.13E-10 | 3.64E-09 |
| Defb37        | 6.954250194 | 8.439430575 | 14.11310663 | 1.696794311 | 2.882824006 | 2.979320725 | 1.965464328 | 2.632836966 | 1.18E-10 | 3.76E-09 |
| Per2          | 24.42366182 | 29.15439653 | 27.12490147 | 9.83448131  | 13.67493439 | 13.1995222  | 1.137184601 | 4.293138052 | 1.23E-10 | 3.90E-09 |
| Taf4b         | 21.44925361 | 23.90498995 | 25.24859249 | 12.29310164 | 10.90298823 | 10.18248855 | 1.079941642 | 4.118721956 | 1.26E-10 | 3.99E-09 |
| Stx19         | 2.890622068 | 2.503563137 | 2.896042111 | 0.865711383 | 0.813104207 | 0.64111965  | 1.827235472 | 0.859849868 | 1.44E-10 | 4.51E-09 |
| Ido1          | 100.339109  | 175.2897997 | 46.74456704 | 25.76357076 | 25.24318969 | 26.43675732 | 2.057316635 | 6.058469035 | 1.48E-10 | 4.59E-09 |
| Mfsd2a        | 33.38877954 | 26.40855309 | 19.90519085 | 11.28887643 | 5.469973754 | 4.67640215  | 1.892070506 | 4.076808915 | 1.68E-10 | 5.14E-09 |
| Sp100         | 37.82944533 | 35.37292433 | 27.45121607 | 13.92063904 | 16.59471767 | 16.78224965 | 1.089692853 | 4.626069967 | 3.39E-10 | 9.63E-09 |
| lnns1abp      | 708.5794444 | 815.7981623 | 745.4657131 | 453.5635078 | 303.5465841 | 325.5002174 | 1.0680283   | 9.126143874 | 4.29E-10 | 1.19E-08 |
| Nox1          | 282.5268874 | 395.9263961 | 321.8277783 | 189.8331921 | 138.9669008 | 151.8699311 | 1.057212058 | 7.947589407 | 4.32E-10 | 1.20E-08 |
| Ttc14         | 82.23610319 | 112.0546404 | 92.10229701 | 56.963809   | 36.40489289 | 43.06815529 | 1.069420497 | 6.139842682 | 4.53E-10 | 1.26E-08 |
| Wfdc18        | 25.51288173 | 40.98575136 | 27.77753067 | 13.15881302 | 12.6031152  | 14.55718734 | 1.225465953 | 4.48990388  | 4.68E-10 | 1.29E-08 |
| Ttl7          | 9.844872262 | 10.70071341 | 9.463123519 | 3.220446345 | 4.545991701 | 4.336985865 | 1.310889676 | 2.818727877 | 4.72E-10 | 1.30E-08 |
| Mdm4          | 55.80157384 | 65.57720217 | 43.11431707 | 29.39955857 | 24.31920764 | 25.34308262 | 1.05660093  | 5.344568973 | 5.26E-10 | 1.43E-08 |
| Kcnq1ot1      | 30.74951592 | 48.45606072 | 31.8156739  | 18.04142522 | 13.45317869 | 15.38687159 | 1.243239569 | 4.720017599 | 5.52E-10 | 1.50E-08 |
| Egr1          | 20.15056833 | 17.1615215  | 20.92492399 | 8.795627651 | 9.868128327 | 8.711684651 | 1.088662033 | 3.838718759 | 5.55E-10 | 1.50E-08 |
| Lgr5          | 22.45468737 | 22.04750763 | 13.62363472 | 6.5101496   | 7.687530682 | 8.372268366 | 1.364845355 | 3.752591508 | 5.67E-10 | 1.52E-08 |
| Gsdmc2        | 615.9957521 | 752.522623  | 776.791915  | 393.8986792 | 207.0458985 | 210.815226  | 1.401987283 | 8.945084761 | 5.71E-10 | 1.53E-08 |
| Scel          | 5.194741109 | 5.976247489 | 5.302612317 | 1.939193498 | 1.884923388 | 2.375913996 | 1.409383162 | 1.934066494 | 5.95E-10 | 1.58E-08 |
| Ddx26b        | 43.4012241  | 55.36104937 | 39.60643507 | 22.23146831 | 20.4754423  | 25.22994386 | 1.026312117 | 5.10536285  | 6.26E-10 | 1.66E-08 |
| Il18          | 105.3610797 | 146.9026241 | 151.2060297 | 51.73491225 | 66.45278926 | 75.50126697 | 1.058919581 | 6.637539556 | 7.75E-10 | 2.02E-08 |
| Ccdc141       | 8.378614691 | 10.41805305 | 6.159188152 | 2.320106506 | 2.919783288 | 3.394162851 | 1.531818393 | 2.493747028 | 1.66E-09 | 4.00E-08 |
| Col4a1        | 4.692024227 | 11.71021467 | 4.81314041  | 1.800679677 | 1.552289849 | 1.621655584 | 2.089134724 | 2.137043256 | 1.76E-09 | 4.20E-08 |
| Trpv3         | 5.446099549 | 5.572446983 | 3.630249971 | 1.419766668 | 1.995801235 | 1.395378061 | 1.604229838 | 1.714926862 | 2.14E-09 | 4.99E-08 |
| A630089N07Rik | 15.33286488 | 24.51069071 | 17.33546334 | 9.315054481 | 6.393955807 | 6.901464463 | 1.337108652 | 3.737399656 | 2.18E-09 | 5.07E-08 |
| Ces2g         | 26.72778086 | 42.52019328 | 30.87751941 | 16.65628701 | 14.74675357 | 14.33090981 | 1.130099642 | 4.605939804 | 2.47E-09 | 5.68E-08 |
| Ttpa          | 3.435232023 | 5.37054673  | 4.242089853 | 1.419766668 | 0.480470668 | 1.433090981 | 1.96253708  | 1.470197608 | 2.69E-09 | 6.10E-08 |
| 4933407K13Rik | 9.132690013 | 13.4869369  | 8.688126334 | 4.570956102 | 3.511131802 | 3.695866215 | 1.408403576 | 2.85211365  | 2.73E-09 | 6.17E-08 |
| Creb3l2       | 12.06520516 | 11.95249498 | 9.585491495 | 4.328556915 | 4.989503087 | 5.242095959 | 1.206670673 | 3.011749146 | 2.93E-09 | 6.58E-08 |
| Adrbk2        | 25.17773715 | 24.18765031 | 14.27626393 | 5.782952038 | 8.131042067 | 9.390517221 | 1.449797243 | 3.859540762 | 3.15E-09 | 6.97E-08 |

|               |             |             |             |             |             |             |             |             |          |          |
|---------------|-------------|-------------|-------------|-------------|-------------|-------------|-------------|-------------|----------|----------|
| Gpx2          | 1199.608158 | 973.0784593 | 988.5293038 | 642.3232177 | 460.4017774 | 445.9552857 | 1.029400283 | 9.616588082 | 3.60E-09 | 7.82E-08 |
| Hif3a         | 10.43137529 | 12.76009599 | 9.585491495 | 4.467070736 | 5.174299497 | 4.789540912 | 1.183418685 | 2.983533528 | 7.36E-09 | 1.48E-07 |
| Gm4951        | 17.97212851 | 7.38954926  | 9.218387566 | 1.6275374   | 2.95674257  | 3.809004977 | 2.042727893 | 2.842387952 | 1.12E-08 | 2.16E-07 |
| Gm684         | 4.817703447 | 5.209026527 | 4.976297712 | 2.008450408 | 2.106679081 | 2.111923552 | 1.267371547 | 1.841853094 | 1.15E-08 | 2.23E-07 |
| Ago3          | 9.928658409 | 10.74109346 | 7.54602522  | 4.36318537  | 3.991602469 | 3.620440374 | 1.234480763 | 2.752815893 | 1.45E-08 | 2.74E-07 |
| Sptsb         | 210.7640526 | 215.9525106 | 459.2878053 | 119.1911432 | 102.1554558 | 117.9660155 | 1.384659438 | 7.674176514 | 2.49E-08 | 4.48E-07 |
| 201001618Rik  | 10.97598525 | 13.2446566  | 8.157865102 | 5.055754477 | 2.143638363 | 2.149636472 | 1.787191691 | 2.804747211 | 3.12E-08 | 5.50E-07 |
| Fut9          | 13.86660731 | 26.24703289 | 14.48021056 | 6.683291876 | 6.356996525 | 7.99513916  | 1.375917997 | 3.660023826 | 3.16E-08 | 5.57E-07 |
| Robo2         | 34.68746482 | 51.00000391 | 29.7354183  | 19.35730652 | 16.66863624 | 18.29076647 | 1.087223816 | 4.824312162 | 3.40E-08 | 5.92E-07 |
| Plekh2        | 6.242067945 | 4.805226021 | 8.565758357 | 2.701019515 | 2.291475492 | 2.300488154 | 1.424182042 | 2.177880695 | 3.54E-08 | 6.12E-07 |
| Arrdc3        | 50.48115351 | 67.07126405 | 92.87729419 | 36.63690573 | 31.78498263 | 33.26279594 | 1.049097468 | 5.702135858 | 3.60E-08 | 6.21E-07 |
| Mrc1          | 3.016301289 | 2.503563137 | 3.222356715 | 1.177367481 | 1.071819182 | 0.565693808 | 1.623631754 | 0.982041635 | 4.00E-08 | 6.83E-07 |
| Grk4          | 7.205608634 | 9.327791688 | 6.526292082 | 3.739873174 | 2.069719799 | 2.866181963 | 1.406732992 | 2.41458006  | 4.08E-08 | 6.96E-07 |
| Dsel          | 15.29097181 | 24.18765031 | 17.7433566  | 8.518600008 | 8.722390581 | 9.579081824 | 1.093440254 | 3.812451795 | 5.60E-08 | 9.24E-07 |
| Wwc2          | 14.830148   | 15.74821973 | 14.68415718 | 6.094608136 | 8.057123503 | 8.183703763 | 1.019797344 | 3.499225987 | 5.73E-08 | 9.44E-07 |
| Slc16a6       | 19.1032415  | 21.11876646 | 26.18674698 | 12.98567074 | 8.981105556 | 9.616794744 | 1.070982912 | 4.033551487 | 6.31E-08 | 1.03E-06 |
| Xkr9          | 10.51516144 | 13.3254167  | 9.463123519 | 4.224671549 | 4.952543804 | 5.619225164 | 1.171073905 | 3.010270145 | 6.33E-08 | 1.03E-06 |
| Gbp4          | 14.70446878 | 14.65795837 | 7.056553314 | 2.943418702 | 4.582950983 | 4.600976309 | 1.586586771 | 3.020958212 | 6.45E-08 | 1.04E-06 |
| Gsap          | 10.97598525 | 12.88123614 | 13.01179484 | 5.782952038 | 6.09828155  | 6.411196496 | 1.011291702 | 3.207708146 | 7.04E-08 | 1.12E-06 |
| Mia2          | 18.05591466 | 18.17102277 | 17.45783132 | 6.648663421 | 9.202861249 | 10.25791439 | 1.040913136 | 3.737422819 | 7.26E-08 | 1.15E-06 |
| Pbx3          | 14.57878956 | 13.93111746 | 10.44206733 | 6.406264234 | 5.950444422 | 6.109493132 | 1.0758046   | 3.264798028 | 7.30E-08 | 1.16E-06 |
| Gm6402        | 3.937948905 | 5.249406578 | 6.199977478 | 1.523652034 | 1.884923388 | 2.375913996 | 1.41287026  | 1.836657445 | 7.99E-08 | 1.25E-06 |
| Nos2          | 91.95529624 | 112.8218614 | 53.23006979 | 40.58454963 | 40.7291289  | 37.37350428 | 1.120122029 | 5.973120676 | 9.29E-08 | 1.43E-06 |
| Mir8116       | 3.686590464 | 4.199525262 | 3.915775249 | 1.973821953 | 1.071819182 | 1.433090981 | 1.390778003 | 1.46632809  | 1.08E-07 | 1.64E-06 |
| Nckap5        | 4.692024227 | 4.320665414 | 2.732884809 | 1.246624391 | 1.182697028 | 1.697081425 | 1.507546188 | 1.426658392 | 1.20E-07 | 1.78E-06 |
| Arntl2        | 2.806835922 | 5.289786629 | 3.426303343 | 1.489023579 | 1.145737746 | 1.282239299 | 1.552443421 | 1.390650876 | 1.41E-07 | 2.07E-06 |
| Cfh           | 42.6052557  | 87.6247098  | 18.88545771 | 0.277027643 | 4.804706676 | 5.091244276 | 3.872857984 | 4.729788749 | 1.67E-07 | 2.40E-06 |
| Cap2          | 14.74636186 | 19.38242429 | 15.54073302 | 9.799852855 | 6.726589346 | 7.240880749 | 1.061889845 | 3.618934986 | 1.94E-07 | 2.72E-06 |
| Bex2          | 5.57177877  | 5.087886376 | 5.588137595 | 1.904565043 | 2.882824006 | 2.187349393 | 1.22002743  | 1.969003854 | 2.03E-07 | 2.83E-06 |
| Slfn4         | 60.87063573 | 52.61520593 | 59.9603085  | 38.36832849 | 19.40362311 | 19.61071869 | 1.163556313 | 5.38697239  | 2.60E-07 | 3.51E-06 |
| Bicd1         | 13.23821121 | 17.04038135 | 15.21441842 | 5.921465859 | 7.022263603 | 8.975675095 | 1.054471003 | 3.495265993 | 2.64E-07 | 3.55E-06 |
| Lcn2          | 10.93409217 | 18.33254297 | 6.689449384 | 3.739873174 | 4.139439598 | 4.110708342 | 1.583743604 | 3.004288195 | 2.92E-07 | 3.88E-06 |
| Nlrp10        | 7.205608634 | 9.40855179  | 9.055230264 | 4.605584557 | 2.95674257  | 3.809004977 | 1.172366256 | 2.636994079 | 3.12E-07 | 4.12E-06 |
| Ccl20         | 2.848728995 | 7.026128804 | 4.038143226 | 1.246624391 | 1.367493439 | 1.772507267 | 1.664966668 | 1.629330995 | 4.11E-07 | 5.21E-06 |
| Tc2n          | 79.2198019  | 111.7316    | 119.4311451 | 26.97556669 | 51.22556502 | 58.56816564 | 1.182572722 | 6.220243379 | 4.30E-07 | 5.43E-06 |
| Ubxn10        | 8.671866205 | 8.197150272 | 8.606547683 | 4.778726834 | 4.102480316 | 3.582727454 | 1.028754832 | 2.67164558  | 4.53E-07 | 5.68E-06 |
| Eya2          | 6.954250194 | 6.016627539 | 6.730238709 | 3.739873174 | 2.661068313 | 2.300488154 | 1.174161979 | 2.25743199  | 5.86E-07 | 7.12E-06 |
| Ttyh1         | 22.03575664 | 21.19952656 | 13.13416281 | 9.176540659 | 8.981105556 | 9.31509138  | 1.036420648 | 3.808807961 | 8.34E-07 | 9.68E-06 |
| Rgma          | 5.320420329 | 5.168646477 | 5.261822991 | 2.874161791 | 2.365394056 | 1.923358949 | 1.132156904 | 1.952124921 | 8.61E-07 | 9.93E-06 |
| Rhoj          | 4.650131154 | 7.066508855 | 2.977620762 | 2.008450408 | 1.663167696 | 0.942823014 | 1.664716383 | 1.705762605 | 9.56E-07 | 1.09E-05 |
| Tnfrsf8       | 7.917790883 | 6.05700759  | 5.261822991 | 3.566730898 | 1.92188267  | 1.772507267 | 1.399261823 | 2.156741794 | 1.02E-06 | 1.16E-05 |
| Il18bp        | 36.94969079 | 33.11164149 | 18.15124985 | 11.04647725 | 14.82067213 | 13.76521601 | 1.154292635 | 4.41544979  | 1.13E-06 | 1.27E-05 |
| 4732471J01Rik | 7.624539369 | 7.954869968 | 7.301289267 | 4.536327647 | 2.661068313 | 3.243311169 | 1.12828732  | 2.485892816 | 1.27E-06 | 1.40E-05 |
| Pfkfb3        | 6.577212533 | 5.41092678  | 3.467092669 | 2.527877238 | 1.034859899 | 1.621655584 | 1.568859924 | 1.799602112 | 1.27E-06 | 1.41E-05 |
| Gm11992       | 6.954250194 | 5.209026527 | 5.588137595 | 2.250849596 | 2.882824006 | 3.054746566 | 1.116473346 | 2.126699394 | 1.59E-06 | 1.72E-05 |
| Lif           | 12.81928048 | 10.09501265 | 8.892072962 | 5.782952038 | 4.804706676 | 5.128957197 | 1.015273828 | 2.99366544  | 1.76E-06 | 1.87E-05 |

|               |             |             |             |             |             |             |             |             |             |            |
|---------------|-------------|-------------|-------------|-------------|-------------|-------------|-------------|-------------|-------------|------------|
| 2210407C18Rik | 411.0129437 | 580.6651276 | 273.0029557 | 152.2959465 | 202.1303139 | 228.2008823 | 1.118155735 | 8.266400113 | 1.77E-06    | 1.88E-05   |
| Bglap3        | 4.566345007 | 4.239905313 | 2.488148856 | 1.6275374   | 1.552289849 | 1.131387617 | 1.383699964 | 1.405229805 | 2.05E-06    | 2.15E-05   |
| Myot          | 2.471691334 | 2.543943188 | 1.713151671 | 0.865711383 | 0.665267078 | 0.942823014 | 1.437983619 | 0.666504119 | 2.10E-06    | 2.20E-05   |
| Srd5a2        | 7.456967075 | 8.479810626 | 6.403924105 | 4.36318537  | 2.587149749 | 3.281024089 | 1.123454732 | 2.453446348 | 2.87E-06    | 2.92E-05   |
| Gsdmcl-ps     | 4.356879639 | 2.826603542 | 4.609193783 | 2.14696423  | 1.108778464 | 1.018248855 | 1.454518492 | 1.446687063 | 3.02E-06    | 3.05E-05   |
| Ppp1r12b      | 5.781244137 | 5.572446983 | 3.915775249 | 2.320106506 | 2.143638363 | 2.526765678 | 1.125618201 | 1.909887493 | 3.03E-06    | 3.05E-05   |
| D930048N14Rik | 12.06520516 | 10.78147351 | 9.503912844 | 6.683291876 | 4.767747394 | 4.525550468 | 1.015167453 | 3.018276641 | 3.08E-06    | 3.09E-05   |
| Tex12         | 2.387905187 | 2.624703289 | 3.099988739 | 1.489023579 | 0.739185642 | 0.754258411 | 1.431323824 | 0.929169768 | 3.14E-06    | 3.15E-05   |
| Adamts3       | 2.346012114 | 3.230404048 | 3.874985924 | 1.315881302 | 1.108778464 | 1.395378061 | 1.304561176 | 1.17936579  | 3.15E-06    | 3.15E-05   |
| Clca2         | 23.46012114 | 34.04038266 | 15.86704762 | 12.95104229 | 9.905087609 | 10.71046944 | 1.127470004 | 4.15901241  | 3.26E-06    | 3.24E-05   |
| Rel           | 4.398772713 | 4.885986123 | 3.059199413 | 1.766051221 | 1.515330567 | 2.036497711 | 1.213248802 | 1.581450805 | 3.71E-06    | 3.61E-05   |
| Gad2          | 4.147414272 | 5.087886376 | 5.098665689 | 2.597134149 | 2.143638363 | 2.074210631 | 1.069524551 | 1.839198795 | 3.80E-06    | 3.69E-05   |
| Dcblid2       | 9.719193042 | 8.358670474 | 6.485502756 | 3.532102442 | 4.287276726 | 4.186134183 | 1.032568718 | 2.6179296   | 3.99E-06    | 3.84E-05   |
| Spry4         | 7.456967075 | 6.380047995 | 4.201300528 | 2.978047157 | 2.328434774 | 2.63990444  | 1.179727908 | 2.129629984 | 4.52E-06    | 4.30E-05   |
| Khdc1a        | 3.141980509 | 6.420428045 | 3.222356715 | 1.800679677 | 0.258714975 | 0.829684252 | 2.13409062  | 1.408876618 | 5.51E-06    | 5.11E-05   |
| Mx2           | 3.39333895  | 2.584323238 | 3.385514017 | 1.835308132 | 0.739185642 | 0.905110094 | 1.416140863 | 1.132767694 | 8.34E-06    | 7.28E-05   |
| Adamts15      | 48.21892755 | 37.1092665  | 20.59860938 | 13.36658375 | 17.85133327 | 17.64964682 | 1.116084886 | 4.690952019 | 9.62E-06    | 8.25E-05   |
| Cav2          | 10.01244456 | 14.41567806 | 16.88678076 | 5.228896753 | 6.911385757 | 7.957426239 | 1.040555884 | 3.361573167 | 1.01E-05    | 8.62E-05   |
| Tac1          | 23.96283802 | 57.01663145 | 44.25641818 | 16.79480083 | 19.07098958 | 22.81631694 | 1.093883773 | 4.939916761 | 1.17E-05    | 9.81E-05   |
| Muc1          | 73.31287855 | 86.29216813 | 45.07220469 | 14.92486424 | 35.48091084 | 35.37471949 | 1.25486582  | 5.597969152 | 1.30E-05    | 0.00010701 |
| Proz          | 3.896055831 | 3.916864908 | 3.222356715 | 1.731422766 | 1.92188267  | 1.659368505 | 1.05248234  | 1.474019295 | 1.33E-05    | 0.0001089  |
| Lonrf3        | 20.40192677 | 23.5415695  | 16.56046616 | 13.92063904 | 7.576652835 | 8.409981286 | 1.014945784 | 3.918051517 | 1.44E-05    | 0.0001168  |
| Gm3002        | 3.602804317 | 5.249406578 | 4.690772434 | 2.770276425 | 0.997900617 | 1.169100538 | 1.4473638   | 1.646852934 | 1.52E-05    | 0.00012193 |
| lgj           | 26.3507432  | 21.44180687 | 25.69727507 | 5.159639842 | 11.71609243 | 14.63261318 | 1.222575612 | 4.131461778 | 1.66E-05    | 0.00013125 |
| Pear1         | 19.85731682 | 15.62707958 | 17.21309537 | 12.25847318 | 7.170100732 | 5.99635437  | 1.049288493 | 3.70778993  | 1.76E-05    | 0.0001384  |
| Arid3a        | 10.8921991  | 11.22565407 | 6.036820176 | 3.635987808 | 4.472073137 | 4.864966753 | 1.117922509 | 2.785643434 | 1.83E-05    | 0.00014266 |
| Eaf2          | 4.063628125 | 10.377673   | 6.893396012 | 2.527877238 | 2.808905441 | 3.35644993  | 1.295529176 | 2.336444017 | 2.32E-05    | 0.00017516 |
| Efcab5        | 6.91235712  | 4.845606072 | 4.446036481 | 2.66639106  | 2.734986877 | 2.564478598 | 1.022168374 | 2.027287414 | 2.32E-05    | 0.00017553 |
| Zfp37         | 4.733917301 | 5.693587135 | 6.893396012 | 2.181592685 | 3.030661134 | 3.281024089 | 1.029742028 | 2.121353215 | 2.55E-05    | 0.00018973 |
| Nccrp1        | 2.890622068 | 3.311164149 | 2.692095484 | 1.6275374   | 1.404452721 | 0.754258411 | 1.223626403 | 1.117338898 | 2.68E-05    | 0.00019786 |
| Rab31         | 6.200174871 | 4.885986123 | 10.19733138 | 4.016900817 | 2.328434774 | 2.63990444  | 1.240664921 | 2.348026852 | 3.92E-05    | 0.00027418 |
| Fam198b       | 5.404206476 | 9.933492447 | 12.52232293 | 5.090382932 | 3.252416827 | 3.507301613 | 1.231293827 | 2.736959918 | 3.98E-05    | 0.00027769 |
| Krt83         | 2.890622068 | 2.624703289 | 2.324991554 | 1.592908945 | 0.960941335 | 0.829684252 | 1.201426074 | 0.946983129 | 4.00E-05    | 0.00027876 |
| Sun3          | 2.513584407 | 3.472684352 | 2.161834252 | 0.761826017 | 1.626208413 | 0.942823014 | 1.290812172 | 0.975123886 | 5.57E-05    | 0.00036994 |
| Gm16386       | 4.147414272 | 5.37054673  | 3.344724692 | 2.66639106  | 1.182697028 | 1.734794346 | 1.198011665 | 1.645271611 | 6.35E-05    | 0.00041478 |
| Cacna2d1      | 2.974408215 | 3.068883846 | 5.139455014 | 1.211995936 | 2.032760517 | 1.734794346 | 1.168103191 | 1.456248381 | 7.27E-05    | 0.00046346 |
| Trim29        | 2.806835922 | 2.503563137 | 4.201300528 | 1.939193498 | 1.034859899 | 1.055961776 | 1.230419443 | 1.209556335 | 7.47E-05    | 0.00047436 |
| Il34          | 3.309552803 | 3.109263896 | 4.894719061 | 1.419766668 | 2.069719799 | 1.923358949 | 1.064342249 | 1.505585317 | 8.25E-05    | 0.00051543 |
| Zc3h12c       | 3.560911244 | 3.109263896 | 2.528938182 | 1.03885366  | 1.478371285 | 1.810220187 | 1.089514644 | 1.205203227 | 9.46E-05    | 0.00057713 |
| Gbp5          | 12.06520516 | 12.51781569 | 2.732884809 | 1.315881302 | 3.104579698 | 3.281024089 | 1.826170411 | 2.550543982 | 9.51E-05    | 0.00057905 |
| Lrp8          | 20.3600337  | 18.00950257 | 16.60125548 | 12.77790001 | 4.17639888  | 3.771292057 | 1.404819245 | 3.661703957 | 9.57E-05    | 0.0005827  |
| Chad          | 3.51901817  | 4.118765161 | 2.284202229 | 1.211995936 | 1.811004824 | 1.508516823 | 1.13050302  | 1.299247404 | 9.63E-05    | 0.00058573 |
| Mir17hg       | 13.99228653 | 11.91211493 | 9.830227448 | 8.483971553 | 3.880724623 | 3.695866215 | 1.150706232 | 3.117490955 | 0.00010453  | 0.00062837 |
| St8sia5       | 4.943382668 | 8.964371233 | 7.219710616 | 4.190043094 | 8.964371233 | 2.866181963 | 1.007655835 | 2.412727792 | 0.000107573 | 0.000643   |
| Slc16a3       | 5.194741109 | 4.320665414 | 4.649983108 | 3.289703255 | 1.441412003 | 1.131387617 | 1.264710694 | 1.761287703 | 0.000109909 | 0.00065324 |
| Tgtp1         | 47.08781456 | 43.16627409 | 14.31705325 | 7.02957643  | 14.93154998 | 16.74453673 | 1.43398142  | 4.578821719 | 0.000122431 | 0.00071632 |

|               |             |             |             |             |             |             |             |             |             |            |
|---------------|-------------|-------------|-------------|-------------|-------------|-------------|-------------|-------------|-------------|------------|
| D7Ertd715e    | 4.817703447 | 6.420428045 | 5.057876363 | 3.809130085 | 2.143638363 | 2.111923552 | 1.010146584 | 2.041491179 | 0.000162588 | 0.00091219 |
| Mndal         | 1.759509085 | 3.149643947 | 2.284202229 | 1.004225204 | 0.960941335 | 1.31995222  | 1.130822053 | 0.851595532 | 0.0001718   | 0.00095432 |
| Foxq1         | 13.69903502 | 13.1638965  | 6.444713431 | 4.120786183 | 6.320037243 | 5.543799323 | 1.059216564 | 3.045305901 | 0.000190023 | 0.00103851 |
| Gbp2          | 126.056258  | 131.3159245 | 59.91951918 | 26.10985531 | 57.32384657 | 62.49030938 | 1.120707347 | 6.271078498 | 0.000204915 | 0.00110422 |
| Zfp618        | 5.781244137 | 4.68408587  | 3.507881994 | 1.6275374   | 2.587149749 | 2.715330281 | 1.012742218 | 1.820104932 | 0.000205968 | 0.00110843 |
| Camsap2       | 14.9977203  | 18.85748363 | 7.953918475 | 4.674841468 | 6.726589346 | 8.221416683 | 1.091764449 | 3.361345328 | 0.000220565 | 0.00117878 |
| I830012O16Rik | 2.094653673 | 1.817102277 | 2.406570205 | 1.142739026 | 1.071819182 | 0.829684252 | 1.04670052  | 0.696506496 | 0.000267877 | 0.00138694 |
| Rims2         | 2.639263628 | 4.966746224 | 2.36578088  | 2.008450408 | 1.034859899 | 1.169100538 | 1.236814061 | 1.275838074 | 0.000278443 | 0.00143522 |
| Ccl8          | 2.052760599 | 2.866983593 | 2.284202229 | 1.177367481 | 1.515330567 | 0.565693808 | 1.138883696 | 0.85042376  | 0.000381736 | 0.00185872 |
| Slc16a12      | 6.242067945 | 5.572446983 | 3.9973539   | 3.913015451 | 1.92188267  | 1.885646028 | 1.028667725 | 1.99158904  | 0.000645314 | 0.00288886 |
| Gbp7          | 67.82488592 | 74.42043325 | 27.08411214 | 14.99412115 | 30.6022856  | 33.26279594 | 1.102620347 | 5.371346215 | 0.000778951 | 0.00337895 |
| Igf1p4        | 11.98141901 | 8.72209093  | 7.668393196 | 7.375860983 | 2.993701852 | 3.130172407 | 1.068090827 | 2.813142316 | 0.001007614 | 0.00418972 |
| F830016B08Rik | 19.31270686 | 24.71259097 | 7.097342639 | 3.566730898 | 7.724489964 | 9.805359347 | 1.277274814 | 3.592872419 | 0.001324876 | 0.00526143 |
| 3930402G23Rik | 6.702891753 | 5.491686882 | 7.382867918 | 5.055754477 | 0.997900617 | 1.470803902 | 1.374071342 | 2.191059572 | 0.001831477 | 0.00691547 |
| Reg3a         | 2.890622068 | 2.261282834 | 1.590783695 | 1.558280489 | 1.034859899 | 0.754258411 | 1.000016702 | 0.801251714 | 0.001854747 | 0.00698569 |
| Gbp9          | 7.750218589 | 7.187649007 | 3.059199413 | 1.939193498 | 3.585050366 | 3.243311169 | 1.037789694 | 2.171441873 | 0.001978503 | 0.00736577 |

Table S2. Genes downregulated &gt;2-fold by Smad4 loss in mouse colon

| GeneSymbol | A_SMAD4_KO_1 | A_SMAD4_KO_2 | A_SMAD4_KO_3 | A_SMAD4_WT_1 | A_SMAD4_WT_2 | A_SMAD4_WT_3 | logFC       | logCPM      | PValue    | FDR       |
|------------|--------------|--------------|--------------|--------------|--------------|--------------|-------------|-------------|-----------|-----------|
| Id3        | 3.141980509  | 3.916864908  | 2.855252786  | 107.2443261  | 133.0903749  | 117.287183   | -5.16997234 | 5.941028174 | 1.02E-187 | 1.19E-183 |
| Mal        | 6.996143267  | 10.74109346  | 5.792084223  | 222.1415409  | 177.0349614  | 187.5840669  | -4.63883313 | 6.671062742 | 2.34E-106 | 1.36E-102 |
| Sult1a1    | 53.79070632  | 65.41568197  | 76.92866792  | 543.1473217  | 699.2696178  | 738.4189847  | -3.33600951 | 8.503800243 | 2.08E-71  | 8.07E-68  |
| Id1        | 45.95670158  | 53.7862274   | 47.92745748  | 205.5545108  | 237.7960212  | 224.3164515  | -2.1765279  | 7.087866225 | 7.42E-54  | 1.72E-50  |
| Selenbp1   | 95.55810055  | 87.14014919  | 120.0021957  | 531.5814176  | 567.8054513  | 535.7120366  | -2.43335592 | 8.335939708 | 1.95E-52  | 3.76E-49  |
| Sct        | 0.963540689  | 1.049881316  | 1.468415718  | 22.4738675   | 16.89039193  | 14.33090981  | -3.94097607 | 3.278096684 | 4.72E-49  | 7.83E-46  |
| Mptx1      | 14.70446878  | 38.23990792  | 19.78282287  | 838.1125041  | 462.7302122  | 477.8981294  | -4.61175083 | 8.270439027 | 7.17E-41  | 9.25E-38  |
| Pdzd7      | 0.12567922   | 0.080760101  | 0.081578651  | 4.467070736  | 3.843765341  | 4.261560024  | -5.38355921 | 1.187947811 | 8.48E-41  | 9.85E-38  |
| Cox7c      | 28.36161073  | 22.37054803  | 28.38937056  | 81.16909927  | 92.06557177  | 86.32487517  | -1.71386052 | 5.822265489 | 7.05E-33  | 4.81E-30  |
| Cyp4b1     | 0.083786147  | 0.080760101  | 0.36710393   | 3.462845532  | 5.469973754  | 5.35523472   | -4.706193   | 1.378061874 | 2.88E-32  | 1.86E-29  |
| Tst        | 66.4424145   | 52.77672613  | 73.13526064  | 206.3163368  | 253.3928382  | 220.9600016  | -1.82313385 | 7.186289455 | 7.14E-31  | 4.14E-28  |
| Cspg4      | 0.083786147  | 0.242280304  | 0.163157302  | 3.532102442  | 3.215457545  | 3.167885327  | -4.29448231 | 0.896177821 | 3.77E-30  | 2.09E-27  |
| Zg16       | 571.4215219  | 470.6294897  | 581.1663099  | 1617.772176  | 2387.680503  | 2360.300847  | -1.97146365 | 10.3789802  | 3.63E-27  | 1.56E-24  |
| Enpep      | 1.759509085  | 1.655582075  | 2.855252786  | 27.77202117  | 14.19236434  | 16.40512045  | -3.21588766 | 3.452062132 | 5.31E-27  | 2.20E-24  |
| Smad4      | 47.84188989  | 59.19715418  | 46.09193783  | 132.4538416  | 147.7632099  | 152.3224862  | -1.49783013 | 6.610896244 | 1.79E-26  | 6.94E-24  |
| Mpst       | 76.20350062  | 60.61045595  | 92.55097959  | 320.0708125  | 268.9896553  | 241.9283854  | -1.8571804  | 7.466579424 | 6.70E-26  | 2.51E-23  |
| Ces1d      | 3.183873583  | 2.988123744  | 6.607870733  | 45.32864801  | 28.9391179   | 29.94405893  | -3.02606877 | 4.297908881 | 7.28E-26  | 2.64E-23  |
| Prss23     | 2.471691334  | 2.180522732  | 2.610516833  | 10.45779351  | 17.81437398  | 17.76278559  | -2.66125529 | 3.172870144 | 3.81E-25  | 1.30E-22  |
| Uqcr11     | 75.44942529  | 59.47981453  | 78.11155836  | 214.8695653  | 220.609955   | 187.998909   | -1.54922667 | 7.124689009 | 4.29E-25  | 1.42E-22  |
| Arhgef19   | 12.1489913   | 10.01425255  | 11.25785384  | 36.53302036  | 37.84630489  | 32.39539877  | -1.67571402 | 4.554610868 | 1.83E-24  | 5.60E-22  |
| Acaa1a     | 27.94268     | 24.59145082  | 30.26567953  | 68.91062608  | 84.89547104  | 74.33216643  | -1.4620253  | 5.699053692 | 3.96E-24  | 1.12E-21  |
| Ugt8a      | 0            | 0.121140152  | 0.040789326  | 1.869936587  | 1.884923388  | 1.923358949  | -4.99566799 | 0.118780038 | 5.57E-24  | 1.54E-21  |
| Nts        | 2.220332893  | 1.574821973  | 1.672362346  | 11.84293172  | 8.463675606  | 9.692220585  | -2.45500526 | 2.597496685 | 7.95E-24  | 2.15E-21  |
| Bcat2      | 32.509025    | 28.30641547  | 30.99988739  | 72.99678381  | 81.4582578   | 76.48180291  | -1.33061545 | 5.75263948  | 1.39E-23  | 3.66E-21  |
| Cdkn1a     | 76.32917984  | 73.24941179  | 75.7865668   | 191.1490734  | 184.9072885  | 171.0280948  | -1.27949576 | 7.009755476 | 5.51E-23  | 1.36E-20  |
| Kcnf1      | 3.644697391  | 3.149643947  | 3.956564575  | 13.15881302  | 13.60101582  | 15.16059407  | -1.961747   | 3.155299746 | 1.80E-22  | 4.18E-20  |
| Ndufb8     | 94.76213216  | 75.99525523  | 103.8496228  | 238.3130295  | 286.6561921  | 252.8651324  | -1.50206014 | 7.455629265 | 3.54E-22  | 8.06E-20  |
| Mettl7a1   | 52.91095177  | 58.10689281  | 69.05632809  | 161.7148863  | 144.8064674  | 148.3249166  | -1.33668995 | 6.727232997 | 4.63E-22  | 1.02E-19  |
| Dio1       | 15.54233025  | 17.32304171  | 14.60257853  | 39.23403988  | 50.48637938  | 53.06207924  | -1.58813517 | 4.992533782 | 6.01E-22  | 1.29E-19  |
| Slc27a4    | 53.83259939  | 40.94537131  | 53.27085912  | 123.6582139  | 127.5834419  | 116.8346279  | -1.31398666 | 6.428721113 | 1.07E-21  | 2.21E-19  |
| Slc25a34   | 14.24364497  | 11.75059472  | 12.80784821  | 34.45531304  | 48.3797003   | 39.90026996  | -1.66101924 | 4.757646971 | 1.48E-21  | 3.01E-19  |
| Phgr1      | 51.40280113  | 42.52019328  | 58.32873548  | 129.1641383  | 151.6808938  | 119.5122453  | -1.39479461 | 6.527159622 | 3.83E-21  | 7.67E-19  |
| Lpo        | 30.12111981  | 35.73634478  | 38.30117666  | 78.88362122  | 122.5939388  | 112.2336516  | -1.59026201 | 6.124575173 | 4.01E-21  | 7.89E-19  |
| Ndufa13    | 76.32917984  | 52.65558598  | 66.64975789  | 192.3610693  | 201.871599   | 160.8833191  | -1.50469442 | 6.968765304 | 1.28E-20  | 2.44E-18  |
| Sepw1      | 32.63470422  | 26.12589274  | 36.22092105  | 77.74088219  | 89.18274776  | 80.1399562   | -1.37908602 | 5.836254309 | 2.32E-20  | 4.21E-18  |
| Rplp2      | 194.8027916  | 156.6745963  | 192.8927203  | 486.9799671  | 491.8171672  | 423.9309401  | -1.36558649 | 8.342724211 | 6.80E-20  | 1.22E-17  |
| Fam189a2   | 10.76651988  | 10.98337376  | 13.62363472  | 37.98741548  | 34.07645812  | 31.11315947  | -1.54409604 | 4.537631599 | 7.31E-20  | 1.29E-17  |
| Etfb       | 79.59683957  | 70.18052794  | 96.09965091  | 216.4971027  | 218.4293573  | 196.5220291  | -1.36070378 | 7.193279466 | 7.83E-20  | 1.36E-17  |
| Hsd17b14   | 0.502716881  | 0.888361113  | 0.571050557  | 3.462845532  | 5.026462369  | 5.242095959  | -2.79339362 | 1.452140148 | 9.75E-20  | 1.67E-17  |
| Aqp1       | 41.18089121  | 33.11164149  | 52.41428328  | 103.8507375  | 148.0588842  | 137.3881696  | -1.61921265 | 6.428434069 | 1.15E-19  | 1.91E-17  |
| Id2        | 6.91235712   | 9.489311891  | 7.015763988  | 22.68163823  | 25.46494538  | 28.13383874  | -1.70233892 | 4.065697588 | 1.44E-19  | 2.32E-17  |
| Trappc6a   | 23.58580036  | 21.72446722  | 21.04729196  | 52.98153664  | 57.95215437  | 50.27132311  | -1.28050619 | 5.249835632 | 2.32E-19  | 3.68E-17  |
| Phospho1   | 4.48255886   | 3.3515442    | 5.873662874  | 17.2795992   | 19.73625665  | 16.36740753  | -1.9605107  | 3.500412197 | 3.93E-19  | 6.08E-17  |
| Smad6      | 6.032602578  | 5.087886376  | 7.423657243  | 20.67318783  | 21.17766866  | 18.8941732   | -1.71125073 | 3.738419136 | 4.60E-19  | 7.03E-17  |

|           |             |             |             |             |             |             |             |             |          |          |
|-----------|-------------|-------------|-------------|-------------|-------------|-------------|-------------|-------------|----------|----------|
| Ndufa7    | 50.60683273 | 50.5154433  | 57.67610627 | 107.7983814 | 131.0945737 | 116.6460633 | -1.16264843 | 6.423605264 | 5.16E-19 | 7.79E-17 |
| Usp2      | 13.11253199 | 15.10213892 | 12.80784821 | 32.62000491 | 39.76818756 | 40.95623173 | -1.46547916 | 4.69218242  | 5.50E-19 | 8.18E-17 |
| Adra2a    | 11.93952593 | 6.218527792 | 14.76573584 | 55.68255615 | 46.23606194 | 46.72630858 | -2.17454902 | 4.92656499  | 5.85E-19 | 8.60E-17 |
| Cox17     | 22.87361811 | 19.38242429 | 23.94333408 | 58.86837404 | 51.59515784 | 53.28835676 | -1.30667885 | 5.264962655 | 6.22E-19 | 9.03E-17 |
| Tff3      | 159.1936791 | 124.7743564 | 119.3903558 | 318.5817889 | 393.0619654 | 349.3347832 | -1.39525958 | 7.931810677 | 8.22E-19 | 1.18E-16 |
| Ndufs7    | 60.451705   | 50.31354305 | 59.26688997 | 130.6531619 | 139.7430457 | 114.3832881 | -1.17827341 | 6.532798355 | 1.02E-18 | 1.43E-16 |
| Isoc2a    | 13.11253199 | 11.10451391 | 14.0723173  | 40.13437971 | 35.37003299 | 31.9051308  | -1.48816236 | 4.609715379 | 1.09E-18 | 1.51E-16 |
| Hmgcs2    | 337.5324928 | 395.5225956 | 732.4539182 | 2003.186883 | 2307.959331 | 2214.238705 | -2.15464245 | 10.37934013 | 1.13E-18 | 1.54E-16 |
| Slc51a    | 18.13970081 | 12.96199624 | 26.30911496 | 64.61669762 | 72.03364086 | 67.27985029 | -1.82845537 | 5.449395045 | 1.38E-18 | 1.87E-16 |
| Gpt       | 24.17230338 | 18.45368312 | 31.44856997 | 69.49930982 | 77.39273677 | 70.03289349 | -1.5500098  | 5.603804395 | 1.55E-18 | 2.07E-16 |
| Kazald1   | 0.251358441 | 0.201900253 | 0.36710393  | 2.043078864 | 2.771946159 | 2.602191519 | -3.15259483 | 0.569955195 | 2.60E-18 | 3.35E-16 |
| Prap1     | 13.40578351 | 9.085511385 | 13.70521337 | 43.59722525 | 34.15037668 | 35.78956162 | -1.64939852 | 4.649181324 | 3.29E-18 | 4.19E-16 |
| Tgfb1     | 3.770376611 | 3.674584605 | 2.36578088  | 11.66978944 | 12.67703377 | 13.0109576  | -1.92760933 | 2.998246824 | 4.43E-18 | 5.59E-16 |
| Ndufa2    | 42.94040029 | 40.4608107  | 52.21033666 | 99.93772205 | 103.1163971 | 97.5633255  | -1.14835947 | 6.186366521 | 7.25E-18 | 9.05E-16 |
| Atg4d     | 52.57580719 | 40.703091   | 45.52088727 | 100.4225204 | 113.3541183 | 98.20444515 | -1.1685119  | 6.233611774 | 8.19E-18 | 1.00E-15 |
| Cd320     | 8.211042397 | 6.904988653 | 8.606547683 | 20.74244474 | 23.72785912 | 23.30658491 | -1.51397556 | 3.942407557 | 9.39E-18 | 1.14E-15 |
| Rps19     | 175.657657  | 172.8266166 | 228.1346976 | 445.6682199 | 514.6210443 | 487.2509337 | -1.32787245 | 8.398679717 | 1.29E-17 | 1.53E-15 |
| Cpm       | 5.446099549 | 5.733967185 | 5.751294897 | 17.21034229 | 53.25832554 | 55.62655783 | -2.89536157 | 4.583432264 | 1.51E-17 | 1.77E-15 |
| Retsat    | 37.45240767 | 37.71496726 | 41.72748    | 74.90134885 | 99.8639803  | 97.33704798 | -1.21863769 | 6.02125921  | 1.52E-17 | 1.77E-15 |
| Ethe1     | 238.2878018 | 190.9572593 | 250.7727732 | 571.923568  | 566.0314057 | 519.3069162 | -1.28516203 | 8.606121392 | 1.93E-17 | 2.21E-15 |
| Acaa2     | 81.4401348  | 79.30641938 | 104.7877772 | 192.4995831 | 273.0551763 | 259.1631901 | -1.44840663 | 7.367777073 | 1.94E-17 | 2.21E-15 |
| Nudt14    | 12.81928048 | 10.70071341 | 12.88942686 | 29.81510003 | 35.22219586 | 31.03773363 | -1.39959348 | 4.472748942 | 3.21E-17 | 3.56E-15 |
| Naprt1    | 31.00087436 | 26.36817304 | 25.81964305 | 60.80756754 | 69.63128752 | 60.68008919 | -1.20000785 | 5.518459383 | 3.22E-17 | 3.56E-15 |
| Acaa1b    | 0.586503028 | 0.444180557 | 1.223679765 | 5.090382932 | 3.954643187 | 4.864966753 | -2.61754398 | 1.495968815 | 3.46E-17 | 3.76E-15 |
| Sgk1      | 28.73864839 | 18.93824373 | 22.02623578 | 55.89032688 | 108.3276559 | 109.0657663 | -1.97091396 | 5.840305879 | 3.60E-17 | 3.83E-15 |
| Tstd1     | 47.79999681 | 44.37767561 | 66.89449384 | 132.5230985 | 132.7207821 | 124.9806188 | -1.2945393  | 6.518469293 | 3.75E-17 | 3.96E-15 |
| Pbld1     | 0.670289175 | 0.524940658 | 0.571050557 | 2.73564797  | 4.435113855 | 4.148421262 | -2.6696055  | 1.199038447 | 4.09E-17 | 4.28E-15 |
| Crip1     | 122.2020953 | 112.5795811 | 161.4033611 | 343.4450198 | 337.73392   | 315.1291642 | -1.33039111 | 7.859291512 | 5.18E-17 | 5.32E-15 |
| St3gal5   | 2.387905187 | 1.049881316 | 3.671039296 | 29.71121466 | 15.48593921 | 15.65086203 | -3.09581869 | 3.52322063  | 6.40E-17 | 6.51E-15 |
| Azgp1     | 0.586503028 | 0.484560607 | 0.81578651  | 2.978047157 | 3.954643187 | 4.186134183 | -2.548338   | 1.190794375 | 6.50E-17 | 6.56E-15 |
| Ndufb2    | 21.70061205 | 26.16627279 | 31.40778064 | 59.28391551 | 72.18147799 | 67.88325702 | -1.32990138 | 5.541031466 | 7.80E-17 | 7.73E-15 |
| Rpl36     | 144.1121727 | 99.13302422 | 133.0139905 | 302.1679011 | 364.7881146 | 308.6425419 | -1.37456722 | 7.816570572 | 7.86E-17 | 7.73E-15 |
| D10Jhu81e | 30.41437133 | 31.53681952 | 32.10119918 | 62.95453177 | 70.14871747 | 66.03532391 | -1.08200312 | 5.614163026 | 9.46E-17 | 9.23E-15 |
| Ndufs6    | 72.55880323 | 58.18765291 | 72.19710616 | 144.3660302 | 144.0672817 | 145.5718734 | -1.0966534  | 6.731672932 | 1.69E-16 | 1.61E-14 |
| Gm11127   | 0.377037661 | 0.68646086  | 0.407893255 | 2.943418702 | 3.104579698 | 2.828469042 | -2.57760077 | 0.879987484 | 1.72E-16 | 1.62E-14 |
| Rab17     | 8.378614691 | 8.600950778 | 10.68680328 | 22.64700978 | 28.5325658  | 25.72021183 | -1.47396013 | 4.13350167  | 1.97E-16 | 1.85E-14 |
| Adck3     | 11.31112983 | 11.02375381 | 14.43942123 | 28.672361   | 37.73542705 | 35.29929365 | -1.46695527 | 4.53626261  | 2.04E-16 | 1.89E-14 |
| Ovol1     | 21.1560021  | 17.76722226 | 16.60125548 | 45.53641874 | 44.2402607  | 42.12533227 | -1.24839838 | 4.970857915 | 2.10E-16 | 1.93E-14 |
| Mt2       | 56.63943531 | 42.64133343 | 31.93804188 | 110.9149424 | 120.7459747 | 123.0572598 | -1.43473433 | 6.341905709 | 3.10E-16 | 2.83E-14 |
| Pmm1      | 14.57878956 | 10.94299371 | 15.01047179 | 32.51611954 | 39.73122828 | 35.97812622 | -1.41668928 | 4.638995247 | 3.33E-16 | 3.00E-14 |
| Tbx3      | 11.64627442 | 12.23515533 | 12.97100551 | 29.50344393 | 28.38472867 | 30.28347521 | -1.25809166 | 4.389447998 | 4.27E-16 | 3.79E-14 |
| Surf1     | 42.85661415 | 41.75297232 | 43.72615695 | 79.22990577 | 91.32638613 | 89.1156313  | -1.01658491 | 6.017498241 | 6.13E-16 | 5.39E-14 |
| Ctsf      | 1.047326836 | 1.130641417 | 1.060522463 | 4.016900817 | 4.656869547 | 4.827253832 | -2.05345667 | 1.538916539 | 7.29E-16 | 6.31E-14 |
| Aldh16a1  | 51.36090806 | 37.43230691 | 43.76694627 | 97.68687245 | 109.6212308 | 89.83217679 | -1.16459676 | 6.164638538 | 9.22E-16 | 7.87E-14 |
| Fam195a   | 13.36389043 | 10.41805305 | 13.33810944 | 40.65380654 | 33.63294673 | 28.66181963 | -1.47187835 | 4.553250326 | 1.01E-15 | 8.58E-14 |
| Acer1     | 11.98141901 | 9.247031587 | 25.20780317 | 73.75860983 | 74.58383132 | 68.29809914 | -2.22158872 | 5.459333441 | 1.03E-15 | 8.65E-14 |

















|               |             |             |             |             |             |             |             |             |             |             |
|---------------|-------------|-------------|-------------|-------------|-------------|-------------|-------------|-------------|-------------|-------------|
| Oaz1          | 1.424364497 | 3.109263896 | 3.589460645 | 5.021126021 | 5.211258779 | 6.712899861 | -1.05728086 | 2.09815926  | 0.000331306 | 0.001658388 |
| Gnb1l         | 1.633829865 | 1.615202024 | 2.324991554 | 4.8826122   | 3.400253955 | 2.866181963 | -1.00031635 | 1.532648394 | 0.000350543 | 0.001737446 |
| Tubb2b        | 0.670289175 | 0.969121214 | 1.101311789 | 2.389363417 | 1.589249131 | 1.885646028 | -1.09375594 | 0.615607394 | 0.00039449  | 0.001913598 |
| Adhfe1        | 1.08921991  | 1.534441923 | 1.101311789 | 1.6275374   | 3.437213237 | 3.130172407 | -1.13042888 | 1.056212913 | 0.000431811 | 0.00206444  |
| Pxdc1         | 1.298685277 | 0.524940658 | 1.142101114 | 4.36318537  | 1.73708626  | 1.772507267 | -1.40939196 | 0.939722901 | 0.000503155 | 0.00233345  |
| Alox5         | 1.424364497 | 0.767220961 | 1.223679765 | 3.220446345 | 2.143638363 | 1.923358949 | -1.09538485 | 0.914454651 | 0.000513707 | 0.002371018 |
| Hck           | 2.848728995 | 2.220902783 | 3.9973539   | 8.65711383  | 5.580851601 | 4.186134183 | -1.02340183 | 2.231424751 | 0.000645759 | 0.002889732 |
| C430002E04Rik | 0.921647616 | 1.413301771 | 0.856575836 | 2.66639106  | 1.774045542 | 2.074210631 | -1.02674834 | 0.779188505 | 0.000744933 | 0.003266275 |
| Vwa5b2        | 1.927081379 | 1.009501265 | 0.774997185 | 2.285478051 | 2.845864723 | 2.489052757 | -1.03761496 | 0.98704434  | 0.000902542 | 0.003833409 |
| Fgf12         | 0.921647616 | 2.099762631 | 2.243412903 | 2.770276425 | 4.250317444 | 3.695866215 | -1.01990724 | 1.465324624 | 0.000910332 | 0.003862257 |
| Mogat2        | 4.356879639 | 3.311164149 | 12.11442968 | 17.31422766 | 14.70979428 | 13.16180928 | -1.19108066 | 3.452699979 | 0.000979469 | 0.004088792 |
| Alpi          | 6.954250194 | 4.966746224 | 19.8236122  | 28.63773255 | 22.98867348 | 21.23237428 | -1.19825268 | 4.134086246 | 0.001202259 | 0.004849138 |
| Pdzd4         | 1.005433763 | 1.33254167  | 1.509205044 | 4.328556915 | 1.884923388 | 2.074210631 | -1.10679703 | 1.091305341 | 0.001312123 | 0.005226878 |
| Vsig2         | 7.959683957 | 6.824228551 | 9.422334193 | 36.94856182 | 10.93994751 | 9.956211029 | -1.25692511 | 3.788697773 | 0.00134488  | 0.005326295 |
| Ang4          | 6.870464047 | 10.66033336 | 16.47888751 | 68.97988299 | 13.41621941 | 15.23601991 | -1.52117577 | 4.466345249 | 0.002107264 | 0.007760509 |
| Dbp           | 4.356879639 | 4.239905313 | 11.17627519 | 6.059979681 | 23.02563276 | 20.96838383 | -1.33881522 | 3.553518179 | 0.00221157  | 0.00806785  |



**Table S3. IPA-identified Inflammatory Genes Upregulated by *Smad4* Loss in Mouse Colon**

| Molecule Name | Entrez Gene ID for Human | Entrez Gene ID for Mouse                                                                      |  |  |
|---------------|--------------------------|-----------------------------------------------------------------------------------------------|--|--|
| ABCC4         | 10257                    | 239273                                                                                        |  |  |
| ADAMTS3       | 9508                     | 330119                                                                                        |  |  |
| ADAMTS15      | 170689                   | 235130                                                                                        |  |  |
| AREG          | 374                      | 11839                                                                                         |  |  |
| BGLAP         | 632                      | 12097 12096 12095                                                                             |  |  |
| C3            | 718                      | 12266                                                                                         |  |  |
| C1GALT1       | 56913                    | 94192                                                                                         |  |  |
| C4A/C4B       | 720 721                  | 625018 12268                                                                                  |  |  |
| CACNA2D1      | 781                      | 12293                                                                                         |  |  |
| Ccl8          |                          | 20307                                                                                         |  |  |
| CCL20         | 6364                     | 20297                                                                                         |  |  |
| CFH           | 3075                     | 12628                                                                                         |  |  |
| CMA1          | 1215                     | 17228                                                                                         |  |  |
| COL4A1        | 1282                     | 12826                                                                                         |  |  |
| CXCL6         | 6372                     | 20311                                                                                         |  |  |
| EGLN3         | 112399                   | 112407                                                                                        |  |  |
| EGR1          | 1958                     | 13653                                                                                         |  |  |
| EREG          | 2069                     | 13874                                                                                         |  |  |
| F3            | 2152                     | 14066                                                                                         |  |  |
| F13A1         | 2162                     | 74145                                                                                         |  |  |
| GABBR1        | 2550                     | 54393                                                                                         |  |  |
| GAD2          | 2572                     | 14417                                                                                         |  |  |
| GBP2          | 2634                     | 14469                                                                                         |  |  |
| GBP5          | 115362                   | 229898                                                                                        |  |  |
| GBP6          | 163351                   | 634650 17472 626578 236573 100702                                                             |  |  |
| GHR           | 2690                     | 14600                                                                                         |  |  |
| GJA1          | 2697                     | 14609                                                                                         |  |  |
| GPX2          | 2877                     | 14776                                                                                         |  |  |
| GSDMC         | 56169                    | 83492 270328 74548 331063                                                                     |  |  |
| H60b/H60c     |                          | 667281 670558                                                                                 |  |  |
| HIF1A         | 3091                     | 15251                                                                                         |  |  |
| IDO1          | 3620                     | 15930                                                                                         |  |  |
| IFI16         | 3428                     | 100504287 545384 226691 236312 15951 102639543 100033459 15950 226695 381308 100040462 623121 |  |  |
| IFI44         | 10561                    | 99899                                                                                         |  |  |
| IFIT2         | 3433                     | 15958                                                                                         |  |  |
| IGFBP4        | 3487                     | 16010                                                                                         |  |  |
| Igha          |                          | 238447                                                                                        |  |  |
| IGKC          | 3514                     | 16071                                                                                         |  |  |
| IL18          | 3606                     | 16173                                                                                         |  |  |
| IL34          | 146433                   | 76527                                                                                         |  |  |

|                         |           |                                                  |  |  |
|-------------------------|-----------|--------------------------------------------------|--|--|
| IL18BP                  | 10068     | 16068                                            |  |  |
| IL1RN                   | 3557      | 16181                                            |  |  |
| ITGA2                   | 3673      | 16398                                            |  |  |
| IVNS1ABP                | 10625     | 117198                                           |  |  |
| KRT15                   | 3866      | 16665                                            |  |  |
| LBP                     | 3929      | 16803                                            |  |  |
| LCN2                    | 3934      | 16819                                            |  |  |
| LIF                     | 3976      | 16878                                            |  |  |
| LTF                     | 4057      | 17002                                            |  |  |
| Ly6a (includes others)  |           | 57248 546644 110454 17071 17067 100041546 546643 |  |  |
| MIR17HG                 | 407975    | 75957                                            |  |  |
| MRC1                    | 4360      | 17533                                            |  |  |
| MUC2                    | 4583      | 17831                                            |  |  |
| Mx1/Mx2                 |           | 17858 17857                                      |  |  |
| Naip1 (includes others) |           | 17952 17951 17940                                |  |  |
| NFATC2                  | 4773      | 18019                                            |  |  |
| NLRP10                  | 338322    | 244202                                           |  |  |
| NOS2                    | 4843      | 18126                                            |  |  |
| NRP1                    | 8829      | 18186                                            |  |  |
| OSMR                    | 9180      | 18414                                            |  |  |
| PDE11A                  | 50940     | 241489                                           |  |  |
| PEAR1                   | 375033    | 73182                                            |  |  |
| PF4                     | 5196      | 56744                                            |  |  |
| PRUNE2                  | 158471    | 353211                                           |  |  |
| RAB31                   | 11031     | 106572                                           |  |  |
| REG3A                   | 5068      | 18489                                            |  |  |
| REL                     | 5966      | 19696                                            |  |  |
| SIGLEC1                 | 6614      | 20612                                            |  |  |
| SLC7A11                 | 23657     | 26570                                            |  |  |
| SLFN5                   | 162394    | 327978                                           |  |  |
| SLFN12L                 | 100506736 | 20558 20557                                      |  |  |
| SLPI                    | 6590      | 20568                                            |  |  |
| SPATS2L                 | 26010     | 67198                                            |  |  |
| SPRY4                   | 81848     | 24066                                            |  |  |
| SRD5A2                  | 6716      | 94224                                            |  |  |
| STEAP4                  | 79689     | 117167                                           |  |  |
| TAC1                    | 6863      | 21333                                            |  |  |
| TCF4                    | 6925      | 21413                                            |  |  |
| TF                      | 7018      | 22041                                            |  |  |
| TICAM2                  | 353376    | 225471                                           |  |  |
| TNFRSF8                 | 943       | 21941                                            |  |  |
| TNFSF13B                | 10673     | 24099                                            |  |  |

|       |        |        |  |  |
|-------|--------|--------|--|--|
| TRIM6 | 117854 | 94088  |  |  |
| TRPV3 | 162514 | 246788 |  |  |

**Table S4. IPA-identified Master Regulators of Genes Upregulated by *Smad4* Loss in Mouse Colon**

| Master Regulator    | Molecule Type    | Depth | Predicted Activation State | Notes  | Activation z-score | p-value of overlap | Network bias-corrected p-value | Causal network | Target-connected regulators |
|---------------------|------------------|-------|----------------------------|--------|--------------------|--------------------|--------------------------------|----------------|-----------------------------|
| IL27RA              | transmembrane    | 3     | Activated                  | biased | 2.785              | 8.94E-17           | 1.00E-04                       | 29 (6)         | 4                           |
| JAK2                | kinase           | 3     |                            |        | 1.768              | 9.69E-17           | 1.00E-04                       | 32 (5)         | 4                           |
| JAK2                | kinase           | 2     | Activated                  | biased | 2.043              | 3.24E-16           | 1.00E-04                       | 29 (4)         | 3                           |
| PRKAA1              | kinase           | 3     |                            | biased | -1                 | 7.55E-16           | 1.00E-04                       | 36 (10)        | 7                           |
| PIAS3               | transcription    | 3     |                            | biased | 1.677              | 2.51E-15           | 1.00E-04                       | 43 (6)         | 5                           |
| STAT1               | transcription    | 2     |                            |        | 0.928              | 4.83E-15           | 1.00E-04                       | 29 (3)         | 3                           |
| AR                  | ligand-dependent | 3     | Activated                  | biased | 3.101              | 2.38E-14           | 1.40E-03                       | 65 (18)        | 14                          |
| FGFR3               | kinase           | 3     |                            |        | 0.392              | 4.76E-14           | 1.00E-04                       | 26 (5)         | 3                           |
| GRB2                | kinase           | 3     |                            | biased | 1.671              | 1.00E-13           | 2.00E-04                       | 29 (8)         | 5                           |
| IL6                 | cytokine         | 3     |                            |        | 1.155              | 1.04E-13           | 2.00E-04                       | 48 (7)         | 5                           |
| STAT3               | transcription    | 2     |                            |        | 0.2                | 1.15E-13           | 1.00E-04                       | 25 (2)         | 2                           |
| CEBPA               | transcription    | 2     | Activated                  |        | 2.043              | 1.19E-13           | 1.00E-04                       | 29 (2)         | 2                           |
| PIAS3               | transcription    | 2     |                            |        | 0.928              | 4.36E-13           | 1.00E-04                       | 29 (3)         | 2                           |
| PTPN11              | phosphatase      | 2     | Inhibited                  | biased | -3.3               | 4.82E-13           | 1.00E-04                       | 18 (3)         | 2                           |
| IL6                 | cytokine         | 2     |                            |        | 0.408              | 5.17E-13           | 1.00E-04                       | 24 (4)         | 3                           |
| CAV1                | transmembrane    | 3     |                            |        | -1.511             | 5.30E-13           | 7.00E-04                       | 53 (9)         | 7                           |
| PPM1D               | phosphatase      | 3     | Inhibited                  |        | -3.266             | 5.36E-13           | 1.60E-03                       | 54 (13)        | 10                          |
| AFAP1L2             | other            | 3     |                            |        | 0.18               | 1.06E-12           | 1.00E-04                       | 31 (7)         | 4                           |
| TIMP3               | other            | 3     |                            | biased | -0.626             | 1.16E-12           | 1.00E-04                       | 23 (5)         | 2                           |
| STAT1               | transcription    | 1     | Activated                  | biased | 3.153              | 1.36E-12           | 1.00E-04                       | 17 (1)         | 1                           |
| PTPN1               | phosphatase      | 2     |                            |        | -0.209             | 2.15E-12           | 1.00E-04                       | 23 (4)         | 3                           |
| Calcineurin protein | complex          | 3     | Activated                  | biased | 2.832              | 2.30E-12           | 1.00E-03                       | 45 (6)         | 4                           |
| APP                 | other            | 3     | Activated                  |        | 3.111              | 3.52E-12           | 2.60E-03                       | 50 (8)         | 7                           |
| PTPRB               | phosphatase      | 3     |                            |        | -0.186             | 3.54E-12           | 1.00E-04                       | 29 (5)         | 2                           |
| PTPRO               | phosphatase      | 3     |                            |        | -0.186             | 3.54E-12           | 1.00E-04                       | 29 (5)         | 2                           |
| PRKAA1              | kinase           | 2     |                            |        | 1.091              | 4.24E-12           | 1.00E-04                       | 21 (3)         | 2                           |

|               |               |   |           |        |        |          |          |         |    |
|---------------|---------------|---|-----------|--------|--------|----------|----------|---------|----|
| LRP1          | transmembran  | 3 |           | biased | -1.091 | 4.24E-12 | 1.00E-04 | 21 (5)  | 2  |
| PIN1          | enzyme        | 3 | Activated | biased | 2.335  | 4.42E-12 | 2.00E-04 | 31 (6)  | 5  |
| PTPRE         | phosphatase   | 3 |           | biased | 1.915  | 4.49E-12 | 6.00E-04 | 33 (10) | 6  |
| TGFB2         | kinase        | 3 |           | biased | 1.569  | 5.36E-12 | 2.00E-04 | 26 (9)  | 6  |
| TGFB1         | growth facto  | 2 |           | biased | 1.8    | 7.38E-12 | 2.00E-04 | 25 (4)  | 3  |
| HAVCR2        | other         | 3 |           | biased | 0.816  | 8.30E-12 | 1.00E-04 | 24 (9)  | 6  |
| RPS6KA3       | kinase        | 3 | Activated |        | 2.252  | 9.47E-12 | 9.00E-03 | 57 (15) | 11 |
| FCGR2A        | transmembran  | 3 |           | biased | -1.732 | 1.10E-11 | 2.00E-04 | 27 (7)  | 4  |
| STAT3         | transcription | 1 |           | biased | 0.894  | 1.15E-11 | 1.00E-04 | 20 (1)  | 1  |
| TLR9          | transmembran  | 3 | Activated | biased | 3.507  | 8.86E-11 | 3.50E-03 | 43 (10) | 7  |
| PIAS1         | transcription | 3 | Activated | biased | 3.536  | 9.12E-11 | 1.00E-03 | 32 (6)  | 5  |
| Hsp27         | group         | 3 | Activated | biased | 2.828  | 1.39E-10 | 1.49E-02 | 50 (9)  | 6  |
| SQSTM1        | transcription | 3 | Activated | biased | 3.656  | 1.81E-10 | 2.30E-03 | 33 (6)  | 5  |
| AR            | ligand-depen  | 2 | Activated | biased | 3.157  | 7.26E-10 | 1.60E-03 | 29 (3)  | 3  |
| BTRC          | enzyme        | 3 |           |        | 1.234  | 1.05E-09 | 7.80E-03 | 42 (9)  | 7  |
| PPP1R13L      | transcription | 3 | Inhibited | biased | -2.535 | 1.31E-08 | 9.10E-03 | 35 (3)  | 3  |
| TGM2          | enzyme        | 3 | Activated | biased | 2.874  | 1.38E-08 | 1.00E-02 | 35 (5)  | 3  |
| NCOR2         | transcription | 3 |           |        | 1.257  | 1.70E-08 | 1.40E-02 | 31 (6)  | 6  |
| ITCH          | enzyme        | 3 | Inhibited | biased | -3     | 1.74E-08 | 1.95E-02 | 36 (4)  | 3  |
| BCL10         | transcription | 3 | Activated | biased | 2.874  | 1.80E-08 | 1.19E-02 | 35 (5)  | 3  |
| Ikb           | group         | 3 | Inhibited | biased | -2.874 | 2.40E-08 | 1.51E-02 | 35 (5)  | 3  |
| PPP2CB        | phosphatase   | 3 |           |        | 0      | 2.41E-08 | 1.70E-02 | 36 (7)  | 4  |
| APP           | other         | 2 | Activated | biased | 3.212  | 2.96E-08 | 1.67E-02 | 35 (4)  | 3  |
| RELA          | transcription | 2 | Activated | biased | 2.744  | 3.37E-08 | 1.32E-02 | 34 (2)  | 2  |
| RNF31         | enzyme        | 3 |           | biased | -1.3   | 5.75E-08 | 2.18E-02 | 29 (8)  | 6  |
| Gamma tubulin | group         | 3 | Activated |        | 2      | 6.61E-08 | 3.76E-02 | 36 (5)  | 4  |
| Hsp27         | group         | 2 | Activated | biased | 3.441  | 7.08E-08 | 2.50E-03 | 19 (3)  | 2  |
| CHEK1         | kinase        | 2 |           |        | -0.343 | 8.35E-08 | 2.14E-02 | 34 (4)  | 3  |
| NCOA3         | transcription | 2 | Activated | biased | 2.041  | 1.01E-07 | 1.14E-02 | 24 (3)  | 3  |
| ARNT          | transcription | 2 |           |        | -0.218 | 1.32E-07 | 5.40E-03 | 21 (3)  | 2  |

|                   |               |   |           |        |        |          |          |         |   |
|-------------------|---------------|---|-----------|--------|--------|----------|----------|---------|---|
| ESR1              | ligand-depen  | 2 |           |        | 0.408  | 1.57E-07 | 1.07E-02 | 24 (3)  | 3 |
| BTRC              | enzyme        | 2 |           |        | 1.807  | 2.13E-07 | 2.20E-03 | 15 (5)  | 4 |
| NCOR2             | transcription | 2 |           |        | 0      | 2.33E-07 | 3.40E-03 | 18 (3)  | 3 |
| XIAP              | enzyme        | 3 |           | biased | -1.091 | 2.41E-07 | 1.51E-02 | 21 (8)  | 5 |
| SMAD7             | transcription | 3 |           |        | 0.688  | 2.60E-07 | 1.52E-02 | 19 (11) | 7 |
| ESR1              | ligand-depen  | 1 |           |        | 0.243  | 2.65E-07 | 3.00E-03 | 17 (1)  | 1 |
| CAV1              | transmembra   | 2 | Inhibited | biased | -2.335 | 3.67E-07 | 3.40E-02 | 31 (3)  | 2 |
| EGR1              | transcription | 3 | Activated | biased | 3.207  | 6.48E-07 | 3.10E-03 | 14 (4)  | 3 |
| IL1B              | cytokine      | 2 | Activated | biased | 3.771  | 6.55E-07 | 1.51E-02 | 18 (5)  | 4 |
| TLR9              | transmembra   | 2 | Activated | biased | 2.496  | 6.64E-07 | 2.50E-03 | 13 (4)  | 3 |
| Ppp1cc            | phosphatase   | 3 | Inhibited | biased | -3.153 | 7.57E-07 | 1.55E-02 | 17 (9)  | 5 |
| ITCH              | enzyme        | 2 |           | biased | -1.732 | 2.55E-06 | 7.20E-03 | 12 (3)  | 2 |
| MUC1              | other         | 2 | Activated | biased | 3.207  | 2.87E-06 | 1.43E-02 | 14 (3)  | 2 |
| IKBKG             | kinase        | 2 | Activated | biased | 3.742  | 4.07E-06 | 1.12E-02 | 14 (5)  | 4 |
| PTPN12            | phosphatase   | 2 |           | biased | -1.265 | 5.88E-06 | 4.10E-03 | 10 (4)  | 3 |
| TRAF3             | enzyme        | 3 | Inhibited | biased | -3.638 | 6.37E-06 | 3.56E-02 | 17 (5)  | 2 |
| MAP3K8            | kinase        | 3 | Activated | biased | 3      | 8.53E-06 | 3.91E-02 | 16 (10) | 6 |
| NFKBIA            | transcription | 2 | Activated | biased | 2.111  | 9.65E-06 | 6.90E-03 | 11 (3)  | 3 |
| HOXA10            | transcription | 1 | Inhibited | biased | -2.121 | 1.50E-05 | 3.60E-03 | 8 (1)   | 1 |
| BCL2              | transporter   | 3 | Inhibited | biased | -3.207 | 1.51E-05 | 3.52E-02 | 14 (6)  | 3 |
| ADAM17            | peptidase     | 3 |           |        | -0.775 | 1.59E-05 | 3.97E-02 | 15 (7)  | 5 |
| ECSIT             | transcription | 2 | Activated | biased | 2.714  | 1.61E-05 | 1.39E-02 | 11 (3)  | 3 |
| CSNK2A2           | kinase        | 2 |           | biased | 1.667  | 1.61E-05 | 5.00E-03 | 9 (3)   | 2 |
| MMP9              | peptidase     | 2 | Inhibited | biased | -2.53  | 3.08E-05 | 1.35E-02 | 10 (3)  | 2 |
| Ikb               | group         | 2 | Inhibited | biased | -2.53  | 3.24E-05 | 1.35E-02 | 10 (3)  | 2 |
| Calcineurin prote | complex       | 2 | Activated | biased | 2.53   | 3.24E-05 | 1.35E-02 | 10 (3)  | 2 |
| PPP1R13L          | transcription | 2 |           | biased | -1.667 | 3.77E-05 | 9.80E-03 | 9 (2)   | 2 |
| SIAH2             | transcription | 2 | Activated | biased | 2.887  | 5.36E-05 | 2.95E-02 | 12 (2)  | 2 |
| HEXIM1            | transcription | 3 | Inhibited | biased | -2.887 | 6.23E-05 | 3.34E-02 | 12 (3)  | 2 |
| ZBTB16            | transcription | 1 |           | biased | -0.816 | 7.98E-05 | 5.50E-03 | 6 (1)   | 1 |

|               |               |   |           |        |        |          |          |        |   |
|---------------|---------------|---|-----------|--------|--------|----------|----------|--------|---|
| P38 MAPK      | group         | 2 | Activated | biased | 2.53   | 8.33E-05 | 4.27E-02 | 10 (3) | 2 |
| RELA          | transcription | 1 | Activated | biased | 2.121  | 9.82E-05 | 1.48E-02 | 8 (1)  | 1 |
| CEBPE         | transcription | 1 | Activated | biased | 2      | 1.15E-04 | 3.80E-03 | 4 (1)  | 1 |
| NFAT5         | transcription | 1 |           | biased | 1.732  | 2.46E-04 | 3.20E-03 | 3 (1)  | 1 |
| BCL2L13       | other         | 2 |           | biased | 0.577  | 2.46E-04 | 1.90E-03 | 3 (3)  | 2 |
| ITGB1         | transmembran  | 3 |           | biased | 0.378  | 2.57E-04 | 3.49E-02 | 7 (5)  | 2 |
| EGR1          | transcription | 1 | Activated | biased | 2.449  | 3.84E-04 | 1.90E-02 | 6 (1)  | 1 |
| KAT6A         | enzyme        | 1 | Activated | biased | 2      | 5.15E-04 | 8.20E-03 | 4 (1)  | 1 |
| NEUROG1       | transcription | 1 |           |        | -1.342 | 6.92E-04 | 1.25E-02 | 5 (1)  | 1 |
| NFATC2        | transcription | 1 | Activated | biased | 2.449  | 7.58E-04 | 4.62E-02 | 6 (1)  | 1 |
| Gm21596/Hmgb1 | transcription | 2 |           | biased | 0.577  | 8.00E-04 | 6.30E-03 | 3 (2)  | 2 |
| IRF1          | transcription | 1 |           | biased | 1.342  | 9.98E-04 | 2.17E-02 | 5 (1)  | 1 |
| MKL2          | transcription | 1 | Inhibited | biased | -2     | 1.46E-03 | 3.22E-02 | 4 (1)  | 1 |
| PRDM1         | transcription | 1 | Inhibited | biased | -2.236 | 2.13E-03 | 4.27E-02 | 5 (1)  | 1 |
| FOXA1         | transcription | 1 |           |        | -1.342 | 3.11E-03 | 4.81E-02 | 5 (1)  | 1 |
| DMRT1         | transcription | 1 |           | biased | 1.414  | 3.67E-03 | 8.20E-03 | 2 (1)  | 1 |
| HOXC8         | transcription | 1 |           |        | 1.732  | 4.22E-03 | 3.38E-02 | 3 (1)  | 1 |
| HIC1          | transcription | 1 |           |        | -1     | 4.50E-03 | 3.68E-02 | 4 (1)  | 1 |
| MYOG          | transcription | 1 |           | biased | 1.414  | 4.68E-03 | 3.09E-02 | 2 (1)  | 1 |
| AEBP1         | peptidase     | 1 |           | biased | 0      | 4.68E-03 | 2.70E-02 | 2 (1)  | 1 |
| CERS2         | transcription | 1 |           | biased | -1.414 | 4.68E-03 | 1.92E-02 | 2 (1)  | 1 |
| SOX4          | transcription | 1 |           | biased | 1.342  | 6.27E-03 | 4.84E-02 | 5 (1)  | 1 |
| Meis1         | transcription | 1 |           | biased | 1      | 1.17E-02 | 2.81E-02 | 1 (1)  | 1 |
| HOXD8         | transcription | 1 |           | biased | -1     | 1.17E-02 | 2.68E-02 | 1 (1)  | 1 |
| HOXD1         | transcription | 1 |           | biased | -1     | 1.17E-02 | 2.68E-02 | 1 (1)  | 1 |
| HOXD9         | transcription | 1 |           | biased | -1     | 1.17E-02 | 2.68E-02 | 1 (1)  | 1 |
| Gm21596/Hmgb1 | transcription | 1 |           | biased | 1.414  | 1.30E-02 | 4.70E-02 | 2 (1)  | 1 |
| EAF2          | transcription | 1 |           |        | -1     | 2.33E-02 | 4.73E-02 | 1 (1)  | 1 |
| HOXD3         | transcription | 1 |           |        | -1     | 2.33E-02 | 2.68E-02 | 1 (1)  | 1 |
| SMAD6         | transcription | 1 |           | biased | -1     | 3.48E-02 | 2.94E-02 | 1 (1)  | 1 |

**Table S5. IPA-identified Master Regulators of Genes Downregulated by *Smad4* Loss in Mouse Colon**

| Master Regulator | Molecule Type   | Depth | Predicted Activation State | Notes  | Activation z-score | p-value of overlap | Network bias-corrected p-value | Causal network | Target-connected regulators |
|------------------|-----------------|-------|----------------------------|--------|--------------------|--------------------|--------------------------------|----------------|-----------------------------|
| RICTOR           | other           | 1     | Activated                  | biased | 5.578              | 2.63E-18           | 1.00E-04                       | 35 (1)         | 1                           |
| ACOX1            | enzyme          | 2     |                            |        | 1.622              | 1.29E-14           | 1.00E-04                       | 38 (2)         | 2                           |
| PPARA            | ligand-dependen | 2     | Inhibited                  |        | -2.335             | 7.12E-12           | 1.00E-04                       | 53 (7)         | 7                           |
| ADCYAP1R1        | G-protein cou   | 3     | Inhibited                  | biased | -3.579             | 2.17E-11           | 4.00E-04                       | 85 (31)        | 30                          |
| PPARA            | ligand-dependen | 1     | Inhibited                  | biased | -2.268             | 6.59E-11           | 1.00E-04                       | 28 (1)         | 1                           |
| BTK              | kinase          | 3     |                            | biased | -1.821             | 2.27E-10           | 1.89E-02                       | 133 (67)       | 60                          |
| MYC              | transcription   | 3     |                            |        | 1.499              | 3.09E-10           | 1.11E-02                       | 114 (41)       | 36                          |
| SREBF2           | transcription   | 3     |                            |        | 0.442              | 8.43E-10           | 1.90E-03                       | 82 (41)        | 41                          |
| PRKCA            | kinase          | 3     |                            |        | -0.189             | 2.08E-09           | 1.12E-02                       | 112 (61)       | 56                          |
| UBE2N            | enzyme          | 3     |                            |        | 1.437              | 2.17E-09           | 3.80E-02                       | 124 (56)       | 53                          |
| ADCY1            | enzyme          | 3     | Inhibited                  | biased | -3.395             | 6.98E-09           | 2.00E-04                       | 42 (10)        | 8                           |
| HDAC3            | transcription   | 3     | Activated                  |        | 2.593              | 8.27E-09           | 4.90E-03                       | 72 (31)        | 31                          |
| CSF1R            | kinase          | 3     |                            |        | 1.584              | 1.46E-08           | 4.33E-02                       | 102 (50)       | 49                          |
| FLCN             | other           | 3     | Activated                  | biased | 4.52               | 2.09E-08           | 7.90E-03                       | 67 (12)        | 12                          |
| NRIP1            | transcription   | 1     | Activated                  | biased | 3                  | 4.67E-08           | 1.00E-04                       | 9 (1)          | 1                           |
| CXCL3            | cytokine        | 3     |                            | biased | -1.455             | 4.70E-08           | 1.41E-02                       | 68 (25)        | 23                          |
| GP6              | transmembran    | 3     | Activated                  |        | 2.717              | 5.01E-08           | 2.60E-02                       | 78 (38)        | 33                          |
| N-cor            | group           | 3     |                            |        | 1.179              | 8.93E-08           | 2.51E-02                       | 72 (30)        | 30                          |
| PPARGC1A         | transcription   | 2     | Inhibited                  | biased | -2.041             | 1.36E-07           | 5.00E-04                       | 24 (4)         | 4                           |
| LRAT             | enzyme          | 3     |                            |        | -1.25              | 1.50E-07           | 2.08E-02                       | 64 (31)        | 31                          |
| APC              | enzyme          | 1     | Activated                  | biased | 2.828              | 1.53E-07           | 1.00E-04                       | 8 (1)          | 1                           |
| FLCN             | other           | 2     | Activated                  | biased | 3.578              | 1.56E-07           | 4.00E-04                       | 20 (4)         | 4                           |
| ITGA1            | other           | 3     |                            |        | 0.894              | 5.82E-07           | 4.39E-02                       | 80 (44)        | 40                          |
| SERCA            | group           | 3     |                            |        | -1.912             | 5.82E-07           | 4.56E-02                       | 70 (37)        | 35                          |
| NCOA2            | transcription   | 2     |                            |        | -0.539             | 5.94E-07           | 1.30E-03                       | 31 (5)         | 4                           |
| LANCL2           | other           | 3     |                            |        | -0.843             | 6.00E-07           | 4.93E-02                       | 69 (30)        | 29                          |



|             |               |   |           |        |        |          |          |         |    |
|-------------|---------------|---|-----------|--------|--------|----------|----------|---------|----|
| Fcgr3       | group         | 3 |           | biased | 1.905  | 6.69E-07 | 3.80E-02 | 54 (21) | 18 |
| CFTR        | ion channel   | 2 |           |        | -0.728 | 9.41E-07 | 4.00E-04 | 17 (4)  | 4  |
| CREB3L3     | transcription | 3 |           |        | -0.25  | 1.51E-06 | 5.00E-02 | 64 (34) | 34 |
| ACOX1       | enzyme        | 1 |           |        | 0      | 1.66E-06 | 3.00E-04 | 14 (1)  | 1  |
| CFTR        | ion channel   | 1 |           |        | -1.265 | 1.66E-06 | 3.00E-04 | 10 (1)  | 1  |
| SLC29A1     | transporter   | 3 | Inhibited | biased | -3.772 | 1.86E-06 | 3.00E-03 | 31 (4)  | 4  |
| AHR         | ligand-depen  | 2 |           | biased | -0.143 | 2.26E-06 | 2.67E-02 | 49 (11) | 11 |
| GPR183      | G-protein co  | 3 |           |        | 0.267  | 2.75E-06 | 4.33E-02 | 56 (27) | 26 |
| BMP10       | growth facto  | 1 |           | biased | -1.342 | 2.99E-06 | 1.00E-04 | 5 (1)   | 1  |
| IL10RA      | transmembra   | 1 | Inhibited |        | -2.236 | 5.82E-06 | 1.20E-03 | 20 (1)  | 1  |
| CREM        | transcription | 3 | Activated | biased | 3.772  | 6.29E-06 | 6.60E-03 | 31 (5)  | 5  |
| INSIG2      | other         | 3 |           | biased | 1.859  | 7.54E-06 | 1.77E-02 | 35 (9)  | 7  |
| KCNA3       | ion channel   | 3 | Activated | biased | 2.795  | 7.57E-06 | 1.36E-02 | 37 (10) | 8  |
| mGLUR Group | group         | 3 | Inhibited | biased | -4.743 | 8.17E-06 | 2.12E-02 | 40 (13) | 11 |
| Creb        | group         | 2 | Inhibited | biased | -3.9   | 8.64E-06 | 6.60E-03 | 29 (3)  | 3  |
| FABP1       | transporter   | 3 | Inhibited | biased | -2.683 | 9.09E-06 | 1.10E-03 | 20 (4)  | 4  |
| ACVR2A      | kinase        | 2 | Inhibited | biased | -2.236 | 1.07E-05 | 3.00E-04 | 5 (4)   | 4  |
| FGF21       | growth facto  | 2 | Inhibited |        | -3     | 1.33E-05 | 3.10E-03 | 25 (5)  | 5  |
| INSIG1      | other         | 3 | Activated | biased | 2.466  | 1.50E-05 | 4.47E-02 | 37 (10) | 9  |
| VTN         | other         | 2 |           | biased | 0.209  | 1.58E-05 | 2.00E-03 | 23 (6)  | 5  |
| CBX5        | transcription | 1 | Activated | biased | 3.317  | 1.77E-05 | 6.00E-04 | 11 (1)  | 1  |
| HNF4A       | transcription | 1 |           |        | 0      | 2.49E-05 | 3.40E-03 | 16 (1)  | 1  |
| ATP1A1      | transporter   | 2 |           | biased | -0.229 | 2.70E-05 | 3.60E-03 | 19 (6)  | 5  |
| HEXIM1      | transcription | 3 |           | biased | 0.928  | 2.87E-05 | 1.43E-02 | 29 (17) | 16 |
| FFAR1       | G-protein co  | 2 | Inhibited | biased | -2.524 | 2.95E-05 | 3.10E-03 | 19 (3)  | 2  |
| MAP4K4      | kinase        | 1 | Activated | biased | 3.317  | 2.97E-05 | 6.00E-04 | 11 (1)  | 1  |
| N-cor       | group         | 2 | Activated | biased | 2.236  | 3.68E-05 | 4.00E-03 | 20 (3)  | 3  |
| TGFB1       | growth facto  | 1 |           | biased | -1.8   | 3.90E-05 | 1.59E-02 | 25 (1)  | 1  |
| GNAQ        | enzyme        | 2 |           | biased | -0.6   | 4.93E-05 | 7.50E-03 | 25 (7)  | 7  |
| NR1I2       | ligand-depen  | 1 |           |        | -0.302 | 5.19E-05 | 3.70E-03 | 11 (1)  | 1  |

|          |               |   |           |        |        |          |          |         |    |
|----------|---------------|---|-----------|--------|--------|----------|----------|---------|----|
| Pde3     | group         | 3 | Inhibited | biased | -2.668 | 5.80E-05 | 4.50E-03 | 17 (5)  | 4  |
| FAAH     | enzyme        | 2 | Activated | biased | 2.828  | 6.21E-05 | 4.60E-03 | 18 (3)  | 3  |
| LHX1     | transcription | 1 | Inhibited | biased | -3.162 | 7.55E-05 | 1.00E-03 | 10 (1)  | 1  |
| SPDEF    | transcription | 2 | Activated | biased | 2.183  | 8.00E-05 | 6.30E-03 | 17 (2)  | 2  |
| BMP15    | growth facto  | 1 | Inhibited | biased | -2     | 8.74E-05 | 7.00E-04 | 4 (1)   | 1  |
| LOX      | enzyme        | 2 |           | biased | 1.877  | 9.79E-05 | 2.51E-02 | 23 (6)  | 5  |
| PPARGC1A | transcription | 1 | Inhibited | biased | -2.887 | 1.10E-04 | 7.40E-03 | 12 (1)  | 1  |
| GPSM1    | other         | 2 |           |        | 0.688  | 1.27E-04 | 6.50E-03 | 19 (4)  | 3  |
| ATP2A2   | transporter   | 2 | Activated | biased | 3.5    | 1.35E-04 | 7.50E-03 | 16 (3)  | 3  |
| TCF7L2   | transcription | 3 |           |        | 0.6    | 1.35E-04 | 1.45E-02 | 25 (3)  | 2  |
| SREBF2   | transcription | 2 |           |        | 0.728  | 1.41E-04 | 1.17E-02 | 17 (5)  | 5  |
| Cyclin A | group         | 2 |           |        | 1.789  | 1.60E-04 | 2.69E-02 | 20 (4)  | 3  |
| HDAC3    | transcription | 2 | Activated |        | 2.4    | 1.75E-04 | 1.46E-02 | 21 (5)  | 5  |
| DMTF1    | transcription | 1 |           | biased | -0.577 | 1.82E-04 | 5.00E-04 | 3 (1)   | 1  |
| sGC      | complex       | 2 |           |        | 1.147  | 1.85E-04 | 1.80E-02 | 19 (3)  | 2  |
| Esrra    | transcription | 1 | Inhibited | biased | -2.121 | 2.10E-04 | 7.80E-03 | 8 (1)   | 1  |
| RPTOR    | other         | 2 |           |        | -1.89  | 2.11E-04 | 4.46E-02 | 28 (11) | 11 |
| PTN      | growth facto  | 2 |           |        | 0.943  | 2.19E-04 | 1.60E-02 | 18 (5)  | 4  |
| P-TEFb   | complex       | 2 |           | biased | -0.229 | 2.21E-04 | 1.61E-02 | 19 (14) | 14 |
| ITGA4    | transmembr    | 2 |           | biased | 0.5    | 2.36E-04 | 1.01E-02 | 16 (5)  | 4  |
| CAMK2A   | kinase        | 2 | Inhibited | biased | -2.5   | 2.47E-04 | 1.21E-02 | 16 (3)  | 2  |
| CREB3L3  | transcription | 2 |           | biased | 0.728  | 2.49E-04 | 1.88E-02 | 17 (5)  | 5  |
| HNF1A    | transcription | 1 | Inhibited | biased | -3.464 | 2.79E-04 | 7.30E-03 | 12 (1)  | 1  |
| IL6      | cytokine      | 1 | Inhibited | biased | -2     | 2.79E-04 | 1.24E-02 | 16 (1)  | 1  |
| FZD9     | G-protein co  | 2 | Inhibited | biased | -2.524 | 3.14E-04 | 2.19E-02 | 19 (3)  | 2  |
| TNRC6A   | other         | 1 |           | biased | 1.732  | 3.14E-04 | 3.30E-03 | 3 (1)   | 1  |
| EP300    | transcription | 1 |           | biased | -0.816 | 3.19E-04 | 4.00E-03 | 6 (1)   | 1  |
| GRB10    | other         | 2 |           |        | -1     | 3.28E-04 | 2.15E-02 | 16 (6)  | 5  |
| EHF      | transcription | 2 |           |        | 1.5    | 3.41E-04 | 2.62E-02 | 16 (3)  | 3  |
| MTM1     | phosphatase   | 2 | Activated | biased | 3.3    | 3.53E-04 | 2.21E-02 | 18 (6)  | 6  |

|             |               |   |           |        |        |          |          |         |    |
|-------------|---------------|---|-----------|--------|--------|----------|----------|---------|----|
| NR1I3       | ligand-depen  | 1 | Inhibited | biased | -2.121 | 3.55E-04 | 6.60E-03 | 8 (1)   | 1  |
| FTO         | enzyme        | 2 |           |        | -1     | 3.64E-04 | 4.60E-02 | 25 (12) | 11 |
| TGFBR1      | kinase        | 2 |           | biased | -1.279 | 3.70E-04 | 2.32E-02 | 22 (8)  | 8  |
| PAX6        | transcription | 2 |           | biased | -1.807 | 3.97E-04 | 2.30E-02 | 15 (2)  | 2  |
| PXN         | other         | 2 |           | biased | -1.604 | 4.18E-04 | 1.47E-02 | 14 (4)  | 4  |
| P-TEFb      | complex       | 1 |           | biased | 1.414  | 4.52E-04 | 6.00E-03 | 2 (1)   | 1  |
| PPP1R13B    | phosphatase   | 1 |           | biased | 1.414  | 4.52E-04 | 7.50E-03 | 2 (1)   | 1  |
| CCT5        | other         | 1 |           | biased | -1.414 | 4.52E-04 | 6.00E-03 | 2 (1)   | 1  |
| H3F3A/H3F3B | other         | 1 |           | biased | 1.414  | 4.52E-04 | 6.00E-03 | 2 (1)   | 1  |
| TCP1        | other         | 1 |           | biased | -1.414 | 4.52E-04 | 6.00E-03 | 2 (1)   | 1  |
| LANCL2      | other         | 2 |           | biased | -1.698 | 4.70E-04 | 2.14E-02 | 17 (3)  | 2  |
| PPARD       | ligand-depen  | 1 | Inhibited | biased | -2.714 | 4.98E-04 | 5.00E-03 | 11 (1)  | 1  |
| NR1H4       | ligand-depen  | 1 | Inhibited |        | -2.333 | 5.03E-04 | 1.24E-02 | 9 (1)   | 1  |
| FAM120A     | other         | 2 |           |        | 0.775  | 5.06E-04 | 1.59E-02 | 15 (4)  | 3  |
| FGFR4       | kinase        | 2 |           |        | -1.414 | 5.16E-04 | 1.92E-02 | 18 (4)  | 3  |
| HDAC1       | transcription | 2 |           | biased | 1      | 5.21E-04 | 3.22E-02 | 16 (2)  | 2  |
| ITGA9       | other         | 2 | Inhibited | biased | -2.324 | 5.93E-04 | 2.16E-02 | 15 (3)  | 2  |
| DRD5        | G-protein co  | 3 | Activated | biased | 2.84   | 6.66E-04 | 2.92E-02 | 15 (4)  | 3  |
| KLB         | enzyme        | 2 |           |        | -1.414 | 6.72E-04 | 2.34E-02 | 18 (4)  | 3  |
| PTGES       | enzyme        | 2 | Activated |        | 3.357  | 7.18E-04 | 3.11E-02 | 15 (2)  | 2  |
| p70 S6k     | group         | 3 | Activated | biased | 2.84   | 7.18E-04 | 3.13E-02 | 15 (4)  | 3  |
| CRY2        | enzyme        | 1 |           | biased | 0.577  | 7.31E-04 | 8.20E-03 | 3 (1)   | 1  |
| FABP5       | transporter   | 2 | Inhibited | biased | -2.065 | 7.53E-04 | 4.00E-02 | 19 (4)  | 3  |
| DUOX2       | enzyme        | 2 |           | biased | 1.941  | 7.70E-04 | 2.38E-02 | 13 (3)  | 3  |
| TNIK        | kinase        | 3 |           | biased | -0.408 | 7.98E-04 | 3.77E-02 | 24 (6)  | 3  |
| SMAD7       | transcription | 1 |           |        | -1.342 | 8.18E-04 | 8.90E-03 | 5 (1)   | 1  |
| PPARG       | ligand-depen  | 1 | Inhibited | biased | -3.207 | 8.48E-04 | 2.96E-02 | 14 (1)  | 1  |
| ENAH        | other         | 2 |           | biased | 0      | 8.82E-04 | 3.02E-02 | 14 (4)  | 3  |
| AQP1        | transporter   | 2 | Inhibited | biased | -2.138 | 8.82E-04 | 2.73E-02 | 14 (2)  | 2  |
| TOP3A       | enzyme        | 3 | Inhibited | biased | -2.138 | 8.82E-04 | 2.83E-02 | 14 (4)  | 4  |

|         |               |   |           |        |        |          |          |        |   |
|---------|---------------|---|-----------|--------|--------|----------|----------|--------|---|
| TCF7L2  | transcription | 1 |           | biased | -1     | 8.94E-04 | 1.53E-02 | 16 (1) | 1 |
| GDF9    | growth facto  | 1 | Inhibited | biased | -2     | 9.08E-04 | 5.90E-03 | 4 (1)  | 1 |
| SREBF2  | transcription | 1 |           | biased | -1.633 | 9.77E-04 | 1.29E-02 | 6 (1)  | 1 |
| PTTG1   | transcription | 2 |           | biased | 1.941  | 9.90E-04 | 2.71E-02 | 13 (2) | 2 |
| RB1     | transcription | 1 |           | biased | -1.732 | 1.00E-03 | 3.18E-02 | 12 (1) | 1 |
| RET     | kinase        | 1 |           |        | 0.577  | 1.03E-03 | 2.70E-03 | 3 (1)  | 1 |
| TADA3   | transcription | 3 |           |        | -1.069 | 1.03E-03 | 2.88E-02 | 14 (4) | 4 |
| GNA11   | enzyme        | 2 |           |        | -1.147 | 1.08E-03 | 4.88E-02 | 19 (4) | 4 |
| TAS1R3  | G-protein co  | 2 |           | biased | 0.535  | 1.11E-03 | 3.69E-02 | 14 (5) | 4 |
| FOXO3   | transcription | 1 | Inhibited | biased | -2.646 | 1.16E-03 | 1.31E-02 | 7 (1)  | 1 |
| PADI4   | enzyme        | 1 |           | biased | 1.414  | 1.34E-03 | 1.39E-02 | 2 (1)  | 1 |
| PTPMT1  | phosphatase   | 1 |           | biased | 1.414  | 1.34E-03 | 6.10E-03 | 2 (1)  | 1 |
| Gcn5l   | group         | 1 |           | biased | -1.414 | 1.34E-03 | 1.34E-02 | 2 (1)  | 1 |
| LCOR    | transcription | 1 |           | biased | 1.414  | 1.34E-03 | 9.20E-03 | 2 (1)  | 1 |
| FHIT    | enzyme        | 1 |           | biased | -1.414 | 1.34E-03 | 1.32E-02 | 2 (1)  | 1 |
| LRP5    | transmembra   | 2 |           | biased | 0.775  | 1.37E-03 | 3.42E-02 | 15 (5) | 4 |
| CRY1    | enzyme        | 1 |           | biased | 1.732  | 1.39E-03 | 1.49E-02 | 3 (1)  | 1 |
| ACVR1   | kinase        | 2 |           | biased | -1.732 | 1.39E-03 | 5.10E-03 | 3 (2)  | 2 |
| SULF2   | enzyme        | 2 |           |        | 1.387  | 1.53E-03 | 4.34E-02 | 13 (4) | 3 |
| CTNNB1  | transcription | 1 | Inhibited | biased | -2.496 | 1.59E-03 | 3.66E-02 | 13 (1) | 1 |
| AHR     | ligand-depen  | 1 |           |        | 0      | 1.74E-03 | 4.21E-02 | 12 (1) | 1 |
| KDM5A   | transcription | 1 | Activated | biased | 3      | 1.78E-03 | 2.37E-02 | 9 (1)  | 1 |
| UGCG    | enzyme        | 1 |           | biased | 1.732  | 1.82E-03 | 1.17E-02 | 3 (1)  | 1 |
| BMPR2   | kinase        | 2 |           | biased | -1.604 | 1.84E-03 | 3.17E-02 | 14 (5) | 5 |
| FABP2   | transporter   | 1 |           |        | 1.732  | 2.33E-03 | 3.20E-03 | 3 (1)  | 1 |
| CHD4    | enzyme        | 1 |           | biased | 1.342  | 2.34E-03 | 9.10E-03 | 5 (1)  | 1 |
| BCAS2   | other         | 1 |           | biased | 1.414  | 2.63E-03 | 2.69E-02 | 2 (1)  | 1 |
| NLN     | peptidase     | 1 |           | biased | 1.414  | 2.63E-03 | 4.00E-03 | 2 (1)  | 1 |
| SMAD1/5 | group         | 1 |           | biased | -1.414 | 2.63E-03 | 5.10E-03 | 2 (1)  | 1 |
| BAG6    | enzyme        | 1 |           | biased | -1.414 | 2.63E-03 | 2.59E-02 | 2 (1)  | 1 |

|          |               |   |           |        |        |          |          |        |   |
|----------|---------------|---|-----------|--------|--------|----------|----------|--------|---|
| CTNNBIP1 | other         | 1 |           | biased | 0      | 2.63E-03 | 1.84E-02 | 2 (1)  | 1 |
| ACVR2A   | kinase        | 1 |           | biased | -1.414 | 2.63E-03 | 3.40E-03 | 2 (1)  | 1 |
| LIMA1    | other         | 1 |           | biased | 0      | 2.63E-03 | 8.70E-03 | 2 (1)  | 1 |
| DDB1     | other         | 1 |           | biased | 1.414  | 2.63E-03 | 2.35E-02 | 2 (1)  | 1 |
| DVL1     | other         | 2 |           |        | 1.265  | 2.64E-03 | 2.87E-02 | 10 (5) | 4 |
| PPARGC1B | transcription | 1 | Inhibited | biased | -2     | 3.15E-03 | 1.57E-02 | 4 (1)  | 1 |
| STAT6    | transcription | 1 |           |        | 0.632  | 3.28E-03 | 4.97E-02 | 10 (1) | 1 |
| VWC2     | other         | 2 | Activated | biased | 2.646  | 3.29E-03 | 2.66E-02 | 7 (3)  | 2 |
| ITGAL    | transmembran  | 2 |           | biased | -0.905 | 3.42E-03 | 4.71E-02 | 11 (3) | 2 |
| SMAD4    | transcription | 1 | Inhibited | biased | -2.646 | 3.49E-03 | 4.98E-02 | 7 (1)  | 1 |
| MLXIPL   | transcription | 2 |           | biased | 0      | 3.58E-03 | 2.31E-02 | 4 (2)  | 2 |
| NUMB     | other         | 2 |           | biased | 1.667  | 3.75E-03 | 4.56E-02 | 9 (3)  | 3 |
| HOXA10   | transcription | 1 |           | biased | 1.89   | 3.94E-03 | 3.63E-02 | 7 (1)  | 1 |
| FGF21    | growth facto  | 1 | Inhibited | biased | -2     | 4.04E-03 | 1.19E-02 | 4 (1)  | 1 |
| SPDEF    | transcription | 1 |           | biased | 0.447  | 4.11E-03 | 2.81E-02 | 5 (1)  | 1 |
| RASSF6   | other         | 1 |           | biased | -1.414 | 4.33E-03 | 1.35E-02 | 2 (1)  | 1 |
| NUBPL    | other         | 1 |           | biased | -1.414 | 4.33E-03 | 1.02E-02 | 2 (1)  | 1 |
| UBR5     | enzyme        | 1 |           | biased | 1.414  | 4.33E-03 | 2.32E-02 | 2 (1)  | 1 |
| BMPER    | other         | 2 | Activated | biased | 2      | 4.54E-03 | 2.68E-02 | 4 (3)  | 2 |
| APLNR    | G-protein co  | 2 |           |        | 0.707  | 4.61E-03 | 3.42E-02 | 8 (3)  | 3 |
| SLC29A1  | transporter   | 1 |           | biased | -0.577 | 5.21E-03 | 2.77E-02 | 3 (1)  | 1 |
| GPS2     | transcription | 1 |           | biased | 1      | 5.66E-03 | 4.21E-02 | 4 (1)  | 1 |
| KLF15    | transcription | 1 | Inhibited | biased | -2     | 5.66E-03 | 2.88E-02 | 4 (1)  | 1 |
| UCP1     | transporter   | 1 | Inhibited | biased | -2.121 | 5.86E-03 | 3.88E-02 | 8 (1)  | 1 |
| BST1     | enzyme        | 2 |           | biased | 1.414  | 5.86E-03 | 4.92E-02 | 8 (3)  | 2 |
| UBE2I    | enzyme        | 1 |           |        | -0.577 | 6.16E-03 | 2.11E-02 | 3 (1)  | 1 |
| RASSF3   | other         | 1 |           | biased | -1.414 | 6.40E-03 | 1.64E-02 | 2 (1)  | 1 |
| AMER1    | other         | 1 |           | biased | 0      | 6.40E-03 | 3.33E-02 | 2 (1)  | 1 |
| MDM4     | enzyme        | 1 |           | biased | 1.414  | 6.40E-03 | 1.49E-02 | 2 (1)  | 1 |
| ERCC1    | enzyme        | 1 |           | biased | 0      | 6.40E-03 | 2.67E-02 | 2 (1)  | 1 |

|               |               |   |           |        |        |          |          |       |   |
|---------------|---------------|---|-----------|--------|--------|----------|----------|-------|---|
| MECOM         | transcription | 1 |           | biased | -1.414 | 6.40E-03 | 3.53E-02 | 2 (1) | 1 |
| RPL22         | other         | 1 |           | biased | 1.414  | 6.40E-03 | 2.53E-02 | 2 (1) | 1 |
| PPP5C         | phosphatase   | 1 |           |        | 1.414  | 6.40E-03 | 4.61E-02 | 2 (1) | 1 |
| IL34          | other         | 2 |           | biased | -1     | 6.95E-03 | 3.30E-02 | 4 (3) | 2 |
| GBF1          | other         | 2 |           | biased | -1     | 6.95E-03 | 3.30E-02 | 4 (3) | 2 |
| NAPA          | transporter   | 2 |           | biased | -1     | 7.67E-03 | 3.30E-02 | 4 (3) | 2 |
| AURKB         | kinase        | 1 |           | biased | 1.732  | 8.33E-03 | 4.74E-02 | 3 (1) | 1 |
| Cbp/p300      | group         | 2 |           |        | 1.732  | 8.33E-03 | 3.28E-02 | 3 (2) | 2 |
| ZBTB33        | other         | 1 |           | biased | -1.414 | 8.84E-03 | 4.17E-02 | 2 (1) | 1 |
| miR-542-3p (m | mature micro  | 1 |           | biased | 1.414  | 8.84E-03 | 8.80E-03 | 2 (1) | 1 |
| TGFB1I1       | transcription | 1 |           | biased | 0      | 8.84E-03 | 3.35E-02 | 2 (1) | 1 |
| GREM1         | other         | 2 |           |        | 0      | 8.84E-03 | 2.96E-02 | 2 (2) | 2 |
| BMP6          | growth facto  | 1 | Inhibited | biased | -2     | 9.24E-03 | 3.19E-02 | 4 (1) | 1 |
| GDF2          | growth facto  | 1 |           | biased | -1.732 | 9.57E-03 | 2.88E-02 | 3 (1) | 1 |
| Pde3          | group         | 2 |           |        | 0.577  | 9.57E-03 | 4.36E-02 | 3 (4) | 3 |
| Vegf          | group         | 1 |           |        | -0.447 | 1.09E-02 | 3.46E-02 | 5 (1) | 1 |
| LTBP4         | growth facto  | 1 |           | biased | 1.414  | 1.16E-02 | 1.81E-02 | 2 (1) | 1 |
| PPM1D         | phosphatase   | 1 |           | biased | 1.414  | 1.16E-02 | 2.43E-02 | 2 (1) | 1 |
| RGS19         | other         | 1 |           | biased | 1.414  | 1.16E-02 | 3.39E-02 | 2 (1) | 1 |
| CTBP1         | enzyme        | 1 |           | biased | 0      | 1.16E-02 | 4.84E-02 | 2 (1) | 1 |
| AIFM1         | enzyme        | 1 |           | biased | -1.414 | 1.16E-02 | 2.46E-02 | 2 (1) | 1 |
| KMT2D         | transcription | 1 | Inhibited | biased | -3     | 1.20E-02 | 2.69E-02 | 9 (1) | 1 |
| GNL3          | other         | 1 |           | biased | 1.732  | 1.24E-02 | 4.88E-02 | 3 (1) | 1 |
| CEACAM6       | other         | 2 |           | biased | -0.447 | 1.24E-02 | 3.49E-02 | 5 (3) | 2 |
| PVR           | other         | 2 |           | biased | 0      | 1.30E-02 | 3.87E-02 | 4 (4) | 3 |
| SDC3          | other         | 2 |           | biased | -0.447 | 1.40E-02 | 3.73E-02 | 5 (3) | 2 |
| mir-221       | microRNA      | 1 |           | biased | 1.414  | 1.47E-02 | 2.78E-02 | 2 (1) | 1 |
| RXRG          | ligand-depen  | 1 |           | biased | -1.414 | 1.47E-02 | 4.27E-02 | 2 (1) | 1 |
| GUCY2D        | kinase        | 2 |           | biased | -0.577 | 1.55E-02 | 3.54E-02 | 3 (3) | 3 |
| NRF1          | transcription | 1 |           | biased | -1.732 | 1.73E-02 | 4.99E-02 | 3 (1) | 1 |

|               |               |   |  |        |        |          |          |       |   |
|---------------|---------------|---|--|--------|--------|----------|----------|-------|---|
| SLC51A        | transporter   | 1 |  | biased | 0      | 1.82E-02 | 4.95E-02 | 2 (1) | 1 |
| ZFHX3         | transcription | 1 |  | biased | -1.414 | 1.82E-02 | 4.45E-02 | 2 (1) | 1 |
| LMX1A         | transcription | 1 |  | biased | -1.414 | 1.82E-02 | 3.95E-02 | 2 (1) | 1 |
| PAX3          | transcription | 1 |  | biased | -1.414 | 1.82E-02 | 4.37E-02 | 2 (1) | 1 |
| DDAH2         | enzyme        | 1 |  | biased | -1     | 2.13E-02 | 2.74E-02 | 1 (1) | 1 |
| SLC17A7       | transporter   | 1 |  | biased | -1     | 2.13E-02 | 3.25E-02 | 1 (1) | 1 |
| KREMEN1       | other         | 1 |  | biased | 1      | 2.13E-02 | 4.50E-02 | 1 (1) | 1 |
| NAP1L2        | other         | 1 |  | biased | -1     | 2.13E-02 | 4.18E-02 | 1 (1) | 1 |
| CCDC8         | other         | 1 |  | biased | -1     | 2.13E-02 | 3.86E-02 | 1 (1) | 1 |
| Raet1a        | other         | 1 |  | biased | 1      | 2.13E-02 | 4.14E-02 | 1 (1) | 1 |
| Raet1b        | other         | 1 |  | biased | 1      | 2.13E-02 | 4.14E-02 | 1 (1) | 1 |
| PAM           | enzyme        | 1 |  | biased | -1     | 2.13E-02 | 3.57E-02 | 1 (1) | 1 |
| miR-616-3p (m | mature micro  | 1 |  | biased | 1      | 2.13E-02 | 3.68E-02 | 1 (1) | 1 |
| miR-23a-5p (a | mature micro  | 1 |  | biased | 1      | 2.13E-02 | 3.24E-02 | 1 (1) | 1 |
| KREMEN2       | other         | 1 |  | biased | 1      | 2.13E-02 | 4.50E-02 | 1 (1) | 1 |
| H60a          | other         | 1 |  | biased | 1      | 2.13E-02 | 4.14E-02 | 1 (1) | 1 |
| MLK           | group         | 1 |  | biased | -1     | 2.13E-02 | 4.38E-02 | 1 (1) | 1 |
| Raet1d/Raet1e | other         | 1 |  | biased | 1      | 2.13E-02 | 4.14E-02 | 1 (1) | 1 |
| SERPINB3      | other         | 1 |  | biased | -1     | 2.13E-02 | 3.69E-02 | 1 (1) | 1 |
| ZNF613        | other         | 1 |  | biased | 1      | 2.13E-02 | 3.73E-02 | 1 (1) | 1 |
| MAG           | other         | 1 |  | biased | 1      | 2.13E-02 | 1.29E-02 | 1 (1) | 1 |
| SRPK2         | kinase        | 1 |  | biased | -1     | 2.13E-02 | 3.76E-02 | 1 (1) | 1 |
| SNRPD1        | other         | 1 |  | biased | 1      | 2.13E-02 | 3.61E-02 | 1 (1) | 1 |
| Pln           | other         | 1 |  | biased | -1     | 2.13E-02 | 4.43E-02 | 1 (1) | 1 |
| LYL1          | transcription | 1 |  |        | -1.414 | 2.19E-02 | 4.36E-02 | 2 (1) | 1 |
| BMPR2         | kinase        | 1 |  | biased | -1.414 | 2.59E-02 | 4.13E-02 | 2 (1) | 1 |
| LGR5          | transmembr    | 1 |  |        | 1      | 4.21E-02 | 3.11E-02 | 1 (1) | 1 |
| ACTC1         | enzyme        | 1 |  | biased | 1      | 4.21E-02 | 4.43E-02 | 1 (1) | 1 |
| HIST1H1C      | other         | 1 |  | biased | 1      | 4.21E-02 | 4.50E-02 | 1 (1) | 1 |
| PDIA3         | peptidase     | 1 |  | biased | -1     | 4.21E-02 | 4.52E-02 | 1 (1) | 1 |

|          |               |   |  |        |    |          |          |       |   |
|----------|---------------|---|--|--------|----|----------|----------|-------|---|
| CTCF     | transcription | 1 |  | biased | -1 | 4.21E-02 | 3.99E-02 | 1 (1) | 1 |
| CDK11B   | kinase        | 1 |  |        | 1  | 4.21E-02 | 3.23E-02 | 1 (1) | 1 |
| Hist1h1e | other         | 1 |  | biased | 1  | 4.21E-02 | 4.50E-02 | 1 (1) | 1 |
| DACT3    | other         | 1 |  | biased | 1  | 6.25E-02 | 4.50E-02 | 1 (1) | 1 |
| LAMTOR2  | other         | 1 |  | biased | -1 | 6.25E-02 | 4.76E-02 | 1 (1) | 1 |
| BRCA2    | transcription | 1 |  | biased | 1  | 6.25E-02 | 3.86E-02 | 1 (1) | 1 |
| MAP3K11  | kinase        | 1 |  |        | -1 | 8.24E-02 | 4.38E-02 | 1 (1) | 1 |
| ZMIZ2    | transcription | 1 |  | biased | -1 | 1.02E-01 | 4.50E-02 | 1 (1) | 1 |
| JAK      | group         | 1 |  | biased | 1  | 1.58E-01 | 4.66E-02 | 1 (1) | 1 |



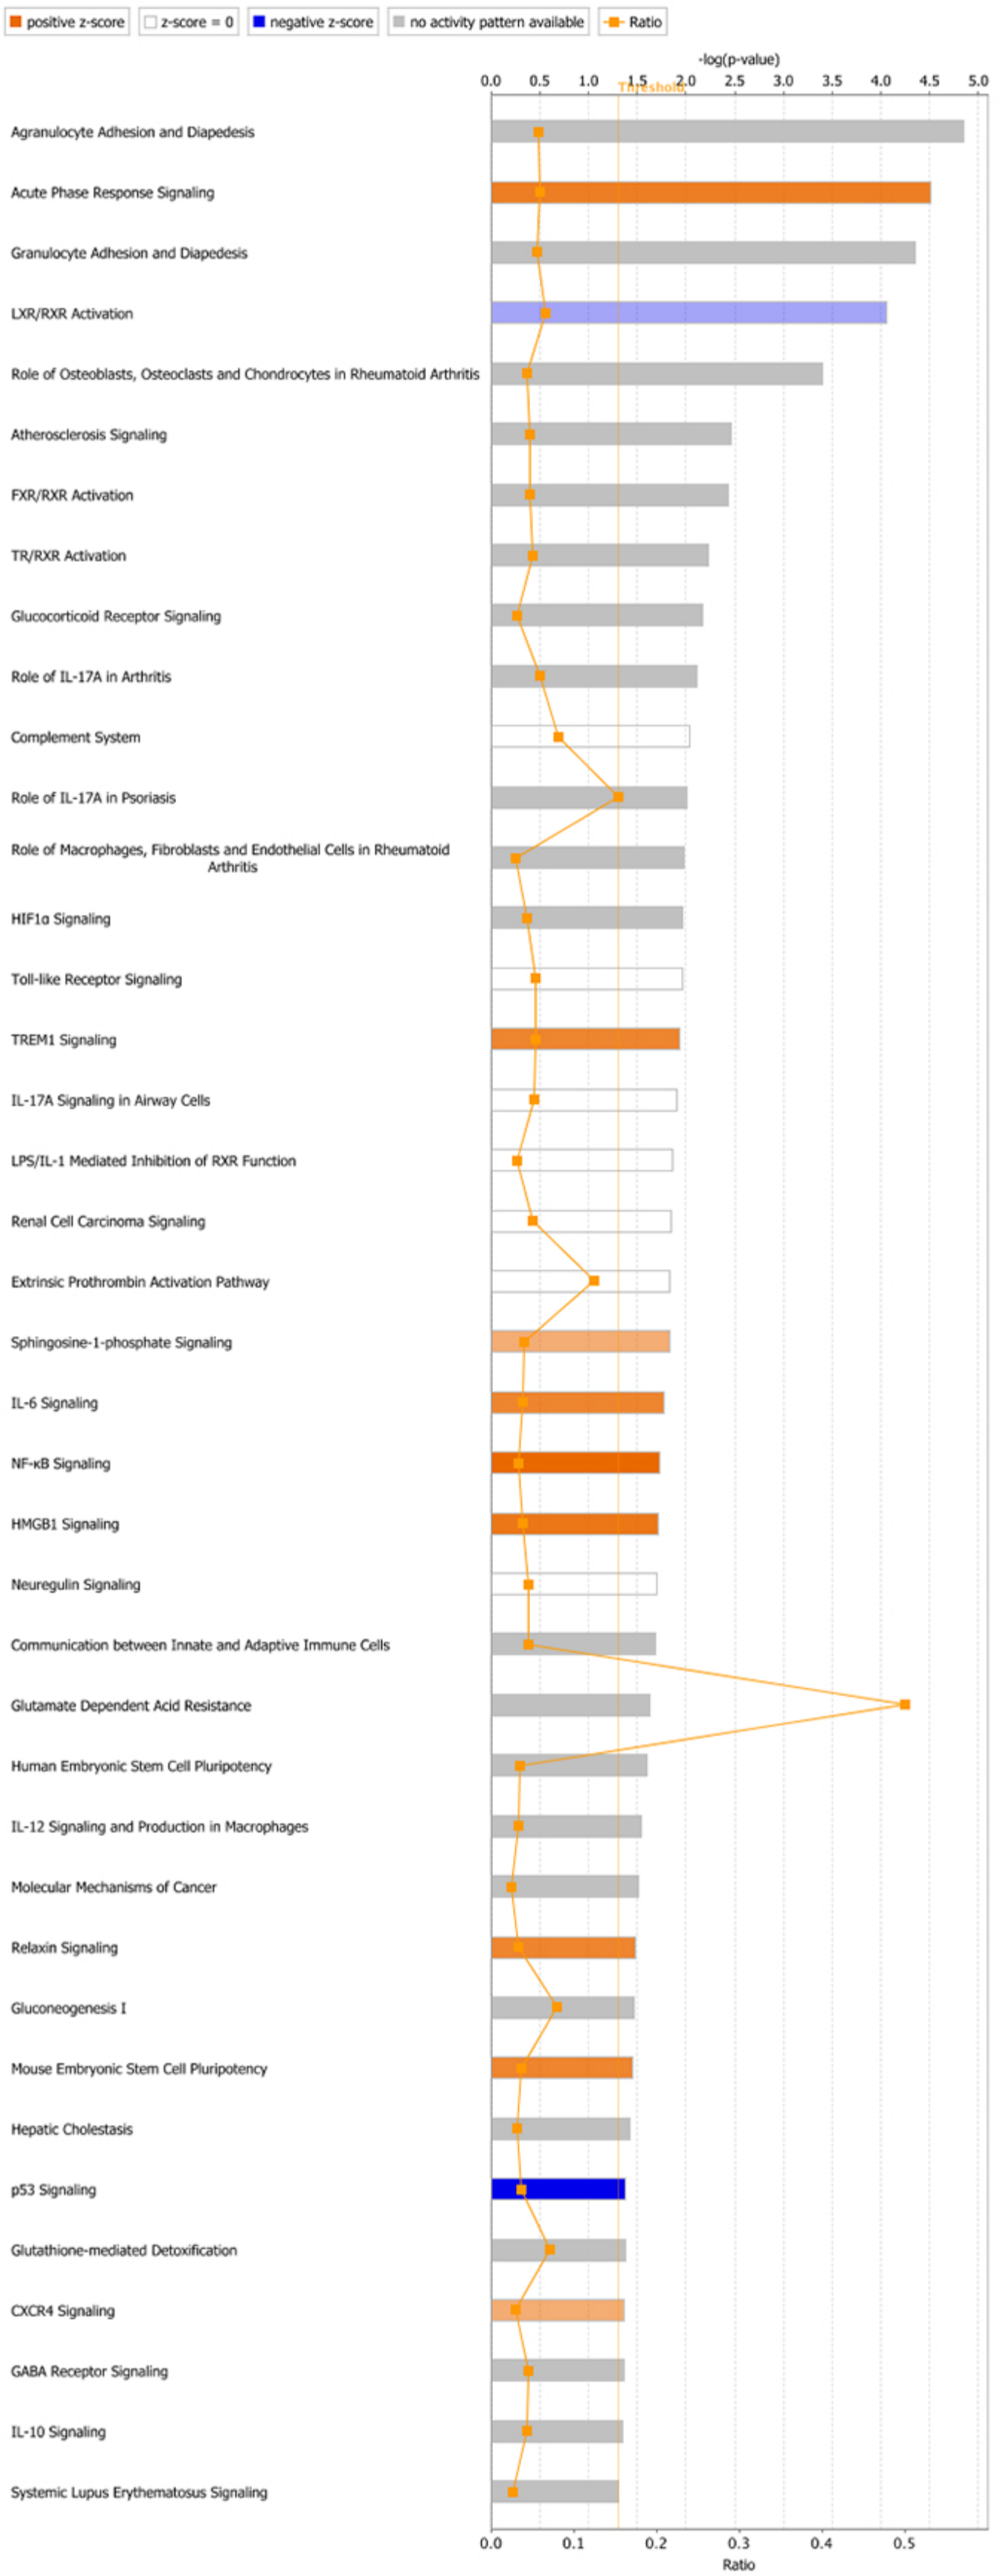

# Supplemental Figure S1

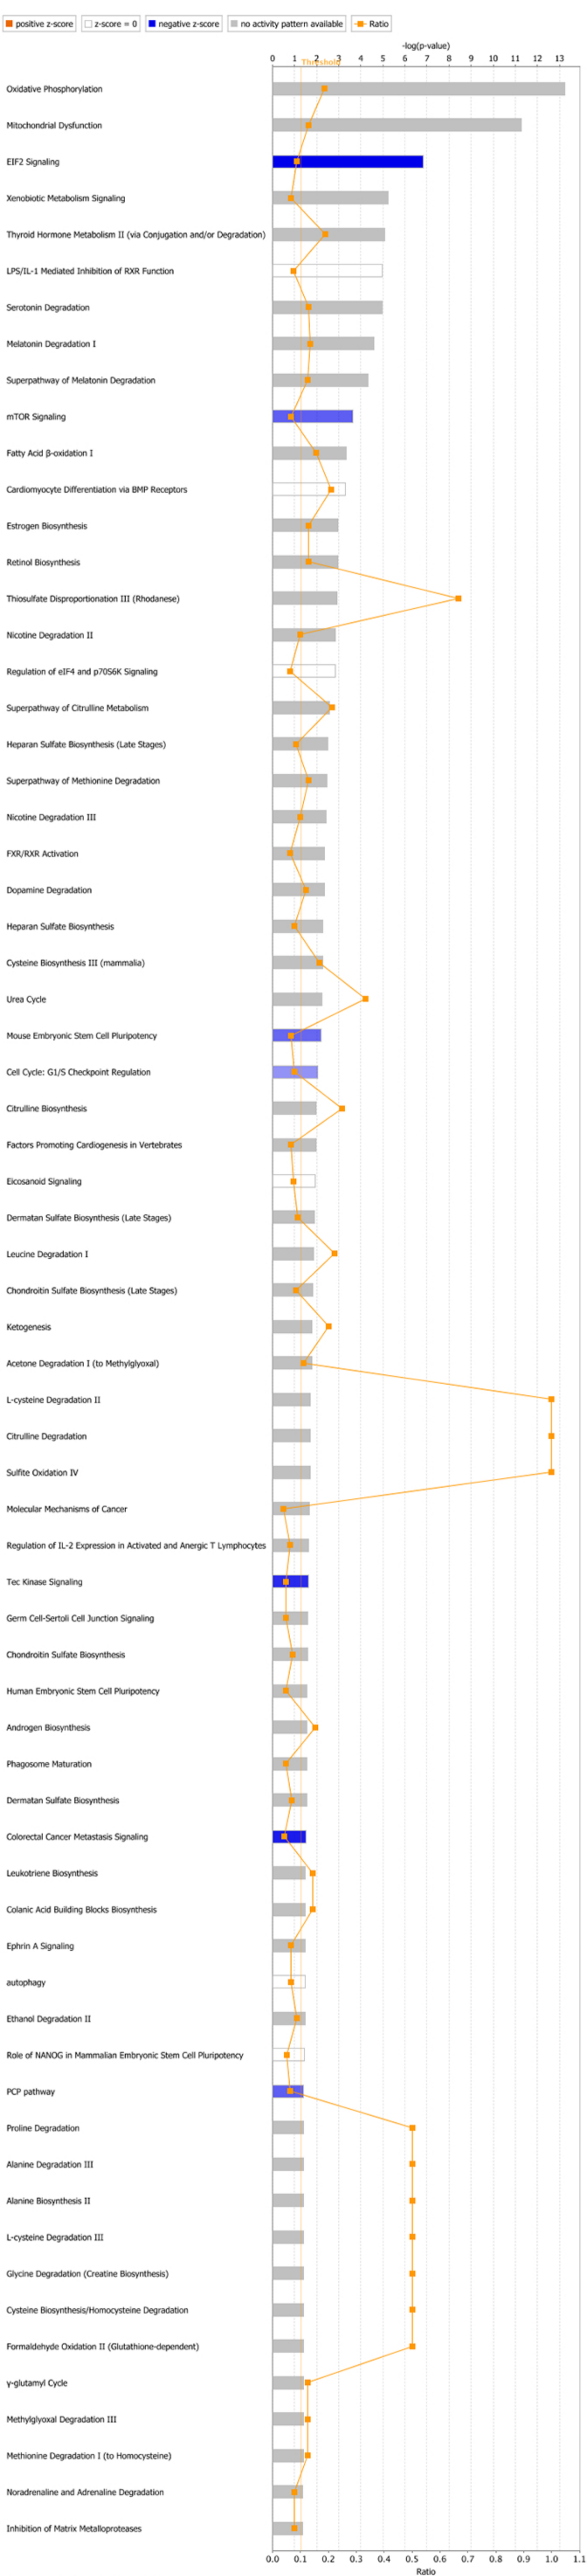

Supplement: mmc1.pdf [file mmc1.pdf]
